1 **Surface-based Single-subject Morphological Brain Networks: Effects of**  
2 **Morphological Index, Brain Parcellation and Similarity Measure, Sample**  
3 **Size-varying Stability and Test-retest Reliability**

4

5 Yinzhi Li<sup>1,5#</sup>, Ningkai Wang<sup>1,5#</sup>, Hao Wang<sup>2</sup>, Yating Lv<sup>3</sup>, Qihong Zou<sup>4</sup> and Jinhui  
6 Wang<sup>1,5\*</sup>

7

8 <sup>1</sup>Institute for Brain Research and Rehabilitation, Guangdong Key Laboratory of  
9 Mental Health and Cognitive Science, Center for Studies of Psychological  
10 Application, South China Normal University, Guangzhou, China

11 <sup>2</sup>Institute of Fundamental and Frontier Sciences, University of Electronic Science and  
12 Technology of China, Chengdu, China

13 <sup>3</sup>Institute of Psychological Sciences, Hangzhou Normal University, Hangzhou,  
14 Zhejiang, China

15 <sup>4</sup>Center for MRI Research, Academy for Advanced Interdisciplinary Studies, Peking  
16 University, Beijing, China

17 <sup>5</sup>Key Laboratory of Brain, Cognition and Education Sciences (South China Normal  
18 University), Ministry of Education

19

20 #These authors contribute equally to this work.

21

22 \*Correspondence author

- 23 Jinhui Wang, Institute for Brain Research and Rehabilitation, Guangdong Key  
24 Laboratory of Mental Health and Cognitive Science, Center for Studies of  
25 Psychological Application, South China Normal University, Guangzhou 510631,  
26 China. Email: [jinhui.wang.1982@m.scnu.edu.cn](mailto:jinhui.wang.1982@m.scnu.edu.cn)

27 **Abstract**

28 Morphological brain networks, in particular those at the individual level, have become  
29 an important approach for studying the human brain connectome; however, relevant  
30 methodology is far from being well-established in their formation, description and  
31 reproducibility. Here, we extended our previous study by constructing and  
32 characterizing single-subject morphological similarity networks from brain volume to  
33 surface space and systematically evaluated their reproducibility with respect to effects  
34 of different choices of morphological index, brain parcellation atlas and similarity  
35 measure, sample size-varying stability and test-retest reliability. Using the Human  
36 Connectome Project dataset, we found that surface-based single-subject  
37 morphological similarity networks shared common small-world organization, high  
38 parallel efficiency, modular architecture and bilaterally distributed hubs regardless of  
39 different analytical strategies. Nevertheless, quantitative values of all interregional  
40 similarities, global network measures and nodal centralities were significantly  
41 affected by choices of morphological index, brain parcellation atlas and similarity  
42 measure. Moreover, the morphological similarity networks varied along with the  
43 number of participants and approached stability until the sample size exceeded ~70.  
44 Using an independent test-retest dataset, we found fair to good, even excellent,  
45 reliability for most interregional similarities and network measures, which were also  
46 modulated by different analytical strategies, in particular choices of morphological  
47 index. Specifically, fractal dimension and sulcal depth outperformed gyrification  
48 index and cortical thickness, higher-resolution atlases outperformed lower-resolution

49 atlases, and Jensen-Shannon divergence-based similarity outperformed  
50 Kullback-Leibler divergence-based similarity. Altogether, our findings propose  
51 surface-based single-subject morphological similarity networks as a reliable method  
52 to characterize the human brain connectome and provide methodological  
53 recommendations and guidance for future research.

54

55 **Keywords:** morphological brain network, cortical surface, structural MRI, sample  
56 size, test-retest reliability

57 **Introduction**

58 Morphological brain networks depict patterns of interregional relations in regional  
59 brain morphology on the basis of structural magnetic resonance imaging. Historically,  
60 morphological brain networks are mainly derived via population-based morphological  
61 covariance network methods by estimating interregional covariance across a cohort of  
62 participants in a certain morphological index, such as gray matter volume, cortical  
63 thickness and surface area (Bassett et al., 2008; He et al., 2007; Sanabria-Diaz et al.,  
64 2010). To date, the population-based morphological covariance network methods have  
65 been widely used as an important tool to study the human brain, including but not  
66 limited to parsing of organizational principles of healthy brains, characterization of  
67 trajectories during development and aging and identification of abnormalities in  
68 various brain diseases (see Alexander-Bloch et al., 2013a; Evans, 2013 for two  
69 excellent reviews).

70       However, the population-based morphological covariance networks suffer from  
71 several noticeable issues, such as neglect of interindividual variability, requirement of  
72 a large sample size and introduction of complicated models for subsequent statistical  
73 inference. All these issues limit the universal application of morphological brain  
74 networks, in particular in uncovering their neurobiological significance and clinical  
75 diagnostic and prognostic value. Recently, the advent of individual-level  
76 morphological similarity networks has overcome, to a great extent, these issues and  
77 has thus attracted considerable attention (Jiang et al., 2017; Kong et al., 2015; Li et al.,  
78 2017; Seidlitz et al., 2018; Tijms et al., 2012; Wang et al., 2016; Yu et al., 2018). With

79 these individual-level methods, several studies show that morphological similarity  
80 networks can capture known cortical cytoarchitecture and related gene expression  
81 (Seidlitz et al., 2018), account for interindividual differences in cognition (Li and  
82 Kong, 2017; Seidlitz et al., 2018; Tijms et al., 2014), and distinguish patients with  
83 schizophrenia from healthy controls (Zhao et al., 2020) and predict clinical  
84 progression of patients with Alzheimer's disease (Tijms et al., 2018). These findings  
85 provide strong evidence that individual-level morphological similarity networks are  
86 biologically meaningful and are of great value in helping clinical diagnosis and  
87 prognosis.

88       Technically, individual-level morphological similarity networks can be divided  
89 into two subcategories. The first estimates interregional morphological similarity by  
90 computing Pearson correlation coefficients in regional mean signals across different  
91 morphological indices (Li et al., 2017; Seidlitz et al., 2018). This type of method,  
92 however, not only neglects intraregional morphological distributions but also may  
93 lead to unstable similarity estimation due to a limited number of morphological  
94 indices available (< 10 in previous studies), which are treated as samples for the  
95 correlation analysis. In contrast, the second subcategory estimates interregional  
96 morphological similarity at a more refined level by taking intraregional morphological  
97 distributions into account from different perspectives (Jiang et al., 2017; Kong et al.,  
98 2015; Tijms et al., 2012; Yu et al., 2018). In this regard, we previously constructed  
99 single-subject morphological similarity networks by estimating interregional  
100 morphological similarity in the distribution of regional gray matter volume in terms of

101 the Kullback-Leibler divergence (*KLD*; Wang et al., 2016). We found that this method  
102 can reveal structured organization of morphological similarity networks with high  
103 test-retest (TRT) reliability (Wang et al., 2016). It should be noted that the Pearson  
104 correlation-based method and the *KLD*-based method are essentially different: the  
105 former estimates interregional morphological similarity in intraregional mean of  
106 multiple morphological indices, while the latter estimates interregional morphological  
107 similarity based on intraregional distribution of a single morphological index. The  
108 Pearson correlation method cannot be used to estimate interregional morphological  
109 similarity based on a single morphological index. This is not only because there are  
110 different numbers of vertices but also because there is no one-to-one correspondence  
111 of the vertices between two regions. Thus, these two types of methods cannot be  
112 compared directly.

113 In the present contribution, we extended our previous study in several aspects.  
114 First, we constructed single-subject morphological similarity networks in cerebral  
115 cortical surface rather than in volume space. The greatest benefit from this switch is  
116 that spherical registration of cortical surface meshes increases the accuracy of brain  
117 registration and thus allows more precise localization (Desai et al., 2005). In addition,  
118 inflation of cortical surface meshes promotes better visualization of buried sulci by  
119 raising them to the surface. Second, there are more forms of morphological indices  
120 available for surface mesh-based analysis, with each capturing different aspects of  
121 cerebral morphology. Thus, in contrast to a single morphological index (i.e., gray  
122 matter volume), used in our previous study, this work examined common and specific

123 degrees of organization among different types of morphological similarity networks  
124 derived from different morphological indices. These analyses are of great significance  
125 for comprehensive understanding of morphological similarity network architecture.  
126 Third, in addition to evaluating different brain parcellation atlases as in our previous  
127 study, this work examined effects of different similarity measures on morphological  
128 similarity networks. Despite accumulating evidence for significant impacts of  
129 different similarity measures on structural and functional brain networks (Liang et al.,  
130 2012; Sarwar et al., 2019; Zalesky et al., 2010), the extent to which morphological  
131 similarity networks depends on choices of similarity measure is largely unknown.  
132 Finally, this work evaluated stability with respect to different sample sizes and TRT  
133 reliability of morphological similarity networks.

134 We hypothesize that quantitative descriptions of surface-based single-subject  
135 morphological similarity networks are dependent on choices of morphological index,  
136 brain parcellation atlas and similarity measure, are robust to variation in sample size  
137 and have high TRT reliability.

138

## 139 **Materials and Methods**

### 140 **General analytical pipeline**

141 In this study, using a large-scale dataset, we first derived 4 surface-based, vertexwise  
142 morphological brain maps (fractal dimension, FD, gyrification index, GI, sulcal depth,  
143 SD, and cortical thickness, CT) for each participant, based on which single-subject  
144 morphological similarity networks were constructed using two surface atlases for



145 brain parcellation (a2009s atlas and a2005s atlas) and two similarity measures for  
146 interregional similarity estimation (*KLD*-based similarity, *KLDs*, and Jensen-Shannon  
147 divergence-based similarity, *JSDs*). Therefore, we obtained 16 morphological  
148 similarity networks in total for each participant (4 morphological indices  $\times$  2  
149 parcellation atlases  $\times$  2 similarity measures). Then, we examined effects of the  
150 different analytical strategies as well as sample sizes on interregional similarity,  
151 global network organization and nodal centrality of the resultant morphological  
152 similarity networks. Finally, we utilized an independent, TRT dataset to explore  
153 reliability of surface-based single-subject morphological similarity networks under  
154 different analytical strategies, aiming to provide methodological recommendations for  
155 future studies. Figure 1 presents a flowchart of the overall pipeline of data processing.

156

## 157 **Participants**

158 Two publicly available datasets were used in this study: the Human Connectome  
159 Project (HCP) S900 dataset ([www.humanconnectome.org](http://www.humanconnectome.org)) (Van Essen et al., 2013)  
160 and the Beijing Normal University (BNU) TRT dataset  
161 ([http://fcon\\_1000.projects.nitrc.org/indi/CoRR/html/bnu\\_1.html](http://fcon_1000.projects.nitrc.org/indi/CoRR/html/bnu_1.html)). The former was  
162 used to characterize the topological organization of morphological similarity networks  
163 under different analytical strategies and effects of different sample sizes, and the latter  
164 was used to evaluate TRT reliabilities of morphological similarity networks.

165 ***HCP S900 dataset.*** The HCP S900 dataset includes a total of 897 healthy adult  
166 participants who completed structural MRI scans. Twenty-one participants were

167 excluded according to our quality control procedures (see below), resulting in 876  
168 participants in the final analyses (male/female: 386/490; main age: 22-35 years).

169 ***BNU TRT dataset.*** The BNU TRT dataset contains a total of 57 healthy young  
170 participants (male/female: 30/27; age: 19-30 years) who each completed two MRI  
171 scan sessions within an interval of approximately 6-weeks ( $40.94 \pm 4.51$  days). All  
172 participants were right-handed and had no history of neurological or psychiatric  
173 disorders.

174

#### 175 **MRI data acquisition**

176 ***HCP S900 dataset.*** T1w images from the HCP S900 dataset were obtained using  
177 a customized 3T Siemens Magnetom Connectome scanner with a 32-channel head  
178 coil. Main imaging parameters were: repetition time (TR) = 2400 ms, echo time (TE)  
179 = 2.14 ms, inversion time (TI) = 1000 ms, flip angle (FA) =  $8^\circ$ , field of view (FOV) =  
180  $224 \times 224$  mm<sup>2</sup>, matrix =  $320 \times 320$ , thickness = 0.7 mm with no gap, and 256 sagittal  
181 slices.

182 ***BNU TRT dataset.*** T1w images from the BNU TRT dataset were obtained using  
183 a 3T Siemens Tim Trio scanner with a 12-channel head coil. Main imaging  
184 parameters were: TR = 2530 ms, TE = 3.39 ms, TI = 1100 ms, FA =  $7^\circ$ , FOV =  $256 \times$   
185  $256$  mm<sup>2</sup>, matrix =  $256 \times 192$ , slice thickness = 1.33 mm; interslice gap = 0.65 mm,  
186 and 144 sagittal slices.

187

#### 188 **Quality control procedures**

189 The HCP S900 dataset underwent multiple levels of quality control, ranging from  
190 real-time oversight during acquisition to post-acquisition manual and automated  
191 image review. Each of these procedures is specified in a formal standard operating  
192 procedure and integrated into the internal database system (Marcus et al., 2013). For  
193 the BNU TRT dataset, the quality control procedures included visual inspection of  
194 severe motion artefacts or any other apparent artefacts, followed by calculation of a  
195 series of quality evaluation metrics, such as signal-to-noise ratio, foreground to  
196 background energy ratio, ghost to signal ratio and artifact detection (Lin et al., 2015).  
197 In addition to the dataset specific quality control procedures, in this study we further  
198 visually checked the results of image segmentation via the modules “Slice Display”  
199 and “Surface Data Homogeneity” in the CAT12 toolbox. Twenty-one participants  
200 were excluded due to failed segmentation or poor image quality for the HCP S900  
201 dataset.

202

### 203 **MRI data preprocessing**

204 All structural images underwent standard processes using Computation Anatomy  
205 Toolbox 12 (CAT12, version r1113, <http://www.neuro.uni-jena.de/cat/>), based on  
206 Statistical Parametric Mapping 12 (SPM12, version 6685,  
207 <https://www.fil.ion.ucl.ac.uk/spm/software/spm12>). The CAT12 offers a  
208 volume-based approach for estimating cerebral surface morphology without extensive  
209 reconstruction of cortical surface and thus is timesaving. Specifically, the CAT12  
210 contains a processing pipeline for computing four morphological indices, including

211 FD, GI, SD and CT. All image preprocessing and morphological parameter  
212 computation described below were conducted in subject native space. After obtaining  
213 individual morphological maps of FD, GI, SD and CT, they were finally resampled  
214 into the common fsaverage template and smoothed using a Gaussian kernel.  
215 Specifically, individual CT maps were smoothed using a Gaussian kernel with 15-mm  
216 full width at half maximum, while individual FD, GI and SD maps were smoothed  
217 using a Gaussian kernel with 25-mm full width at half maximum. Based on the  
218 recommendations of the CAT12 manual, the usage of larger filter sizes for FD, GI and  
219 SD is due to the underlying nature of these folding measures that reflect contributions  
220 from both sulci and gyri. Therefore, the filter size should exceed the distance between  
221 a gyral crown and a sulcal fundus.

222 ***CT calculation.*** CT was estimated using a fast and reliable projection-based  
223 thickness (PBT) method, which requires no extensive reconstruction of the cortical  
224 surface. First, following tissue segmentation, a white matter (WM) distance map was  
225 derived by estimating the distance from the inner gray matter (GM) boundary for each  
226 GM voxel (Dahnke et al., 2013). Values at the outer GM boundary in the WM  
227 distance map (i.e., GM thickness) were then projected back to the inner GM boundary  
228 to generate a GM thickness map. Subsequently, a central surface was created at the 50%  
229 level of the percentage position between the WM distance and GM thickness maps.  
230 For the resultant central surface, a topology correction based on spherical harmonics  
231 was used to account for topological defects (Yotter et al., 2011a). Furthermore, the  
232 central surface was reparameterized into a common coordinate system via spherical

233 mapping (Yotter et al., 2011c), and spherical registration adopted the volume-based  
234 diffeomorphic DARTEL algorithm (Ashburner, 2007) to the surface.

235 ***FD calculation.*** FD reflects cortical surface folding complexity. It was estimated  
236 based on spherical harmonic reconstructions and calculated as the slope of a  
237 logarithmic plot of surface area versus the maximum l-value, where the maximum  
238 l-value is a measure of the bandwidth of frequencies used to reconstruct the surface  
239 shape (Yotter et al., 2011b).

240 ***GI calculation.*** GI is an indicator of cortical folding. Based on the spherical  
241 harmonic reconstructions, GI was calculated as absolute mean curvature (Luders et al.,  
242 2006). Mean curvature is an extrinsic surface measure, which provides information  
243 about the change in normal direction along the surface.

244 ***SD calculation.*** SD measures the depth of sulci and was calculated as the  
245 Euclidean distance between the central surface and its convex hull based on the  
246 spherical harmonic reconstructions.

247

## 248 **Construction of individual morphological similarity networks**

249 A network is made up of nodes and edges between the nodes. In this study, we  
250 constructed large-scale morphological similarity networks with nodes denoting brain  
251 regions and edges denoting interregional similarity in intraregional distributions of  
252 morphological indices.

253 ***Definition of network nodes.*** To define network nodes, we employed two widely  
254 used surface atlases, the a2009s atlas (Destrieux et al., 2010) and the DK40 atlas

255 (termed a2005s atlas in this study) (Desikan et al., 2006), which divided the cerebral  
256 cortex into 148 and 68 regions of interest (ROIs), respectively.

257 **Definition of network edges.** To estimate interregional morphological similarity,  
258 we utilized two measures, the *KLDs* and its variant, the *JSDs*, to estimate the  
259 similarity in intraregional distribution of morphological indices between regions. In  
260 mathematical statistics, the *KLD* is a measure of how one probability distribution is  
261 different from a second, reference probability distribution (Kullback and Leibler,  
262 1951). This measure has been widely used in the fields of image processing and  
263 machine learning. First, we extracted values of all vertices within each ROI for each  
264 morphological index. Then, a probability density estimate was computed for each  
265 ROI and each morphological index based on a normal kernel function (MATLAB  
266 function, *ksdensity*). The resultant probability density functions (four per region) were  
267 further converted to probability distribution functions (PDFs). The *KLDs* between two  
268 PDFs  $P$  and  $Q$  is computed as:

$$269 \quad KLDs(P, Q) = e^{-D_{KL}(P, Q)},$$

270 where  $e$  is the natural base and  $D_{KL}(P, Q) = KLD(P||Q) + KLD(Q||P) =$   
271  $\sum_{i=1}^n P(i) \log \frac{P(i)}{Q(i)} + \sum_{i=1}^n Q(i) \log \frac{Q(i)}{P(i)}$ , with  $n$  being the number of sample points ( $2^8$   
272 in this study) (Wang et al., 2016). For the *JSDs* between  $P$  and  $Q$ , the formula is:

$$273 \quad JSDs = 1 - D_{JS} = 1 - \sqrt{JSD(P||Q)},$$

274 where  $JSD(P||Q) = \frac{1}{2} KLD(P||\frac{1}{2}(P+Q)) + \frac{1}{2} KLD(Q||\frac{1}{2}(P+Q))$ . The value range  
275 for both *KLDs* and *JSDs* is  $[0, 1]$ , with 0 and 1 denoting that two PDFs are absolutely  
276 different or exactly the same, respectively.

277

## 278 **Network analysis**

279 Prior to graph-based topological characterization of morphological similarity

280 networks derived above, a thresholding procedure was used to convert each network

281 to a series of binary graphs. All topological analyses were performed with the

282 GRETNA toolbox (Wang et al., 2015).

283 *Threshold selection.* Consistent with our previous study (Wang et al., 2016), we

284 employed a sparsity-based thresholding procedure, where sparsity was defined as the

285 ratio of the number of actual edges divided by the maximum possible number of

286 edges in a graph. Given the lack of a conclusive method for selecting a single sparsity,

287 a consecutive sparsity range was used in this study: [0.034 0.4] for the a2009s atlas

288 and [0.063 0.4] for the a2005s atlas (interval = 0.02). The lower limits of the sparsity

289 ranges were chosen to ensure that the resultant graphs would be estimable for the

290 small-world attributes (Watts and Strogatz, 1998), that is, the average nodal degree

291 (nodal degree is defined as the number of edges linked to a node) over all nodes of

292 each thresholded graph is larger than  $2 \times \log(N)$ , with  $N$  denoting the number of nodes

293 (i.e., 68 or 148 in this study). This criterion guarantees that the generated random

294 networks are connected and thus the small world parameters can be successfully

295 calculated (Watts and Strogatz, 1998). For the upper limits of the sparsity ranges, they

296 were determined to guarantee that the thresholded graphs have sparse properties (He

297 et al., 2007; Wang et al., 2009). All subsequent topological analyses were conducted

298 at each sparsity level, and thus each network measure calculated below is a function

299 or curve of sparsity. To provide sparsity-independent summary scalars, we computed  
300 the area under the curve (AUC; i.e., the integral over the entire sparsity range) for  
301 each network measure (Zhang et al., 2011), which were used to simplify the TRT  
302 reliability and statistical analyses.

303 ***Global and nodal network measures.*** For each graph, we calculated both global  
304 (clustering coefficient,  $C_p$ ; characteristic path length,  $L_p$ ; local efficiency,  $E_{loc}$ ; global  
305 efficiency,  $E_{glob}$ ; and modularity,  $Q$ ) and nodal (nodal degree,  $k_i$ ; nodal efficiency,  $e_i$ ;  
306 and nodal betweenness,  $b_i$ ) measures. Detailed formulas and interpretations of these  
307 measures can be found elsewhere (Rubinov and Sporns, 2010; Wang et al., 2011) and  
308 are summarized in Table S1. To test whether the morphological similarity networks  
309 were non-randomly organized, all global measures were further normalized by  
310 dividing them by corresponding measures averaged over 100 matched random  
311 networks. The random networks were generated using a topological rewiring method  
312 (Maslov and Sneppen, 2002), which guaranteed the same degree distributions  
313 between real and random networks. Typically, a small-world, highly efficient and  
314 modular network should fulfill the following conditions: normalized  $C_p > 1$  and  
315 normalized  $L_p \sim 1$ , normalized  $E_{loc} > 1$  and normalized  $E_{glob} \sim 1$  and normalized  $Q >$   
316 1.

317

### 318 **TRT reliability**

319 We calculated the intraclass correlation coefficient (*ICC*) (Shrout and Fleiss, 1979) to  
320 quantify TRT reliability of morphological similarity networks. Formally, for a given



321 measure repeatedly observed  $k$  times, the  $ICC$  was calculated as:

$$322 \quad ICC = \frac{MS_b - MS_w}{MS_b + (k-1)MS_w},$$

323 where  $MS_b$  is the between-subject sum of squares and  $MS_w$  is the within-subject  
324 sum of squares.  $ICC$  is close to 1 for reliable measures and 0 (negative) otherwise. In  
325 accordance with our previous studies (Wang et al., 2016; Wang et al., 2011), the TRT  
326 reliability scores were categorized as poor ( $ICC < 0.25$ ), low ( $0.25 < ICC < 0.4$ ), fair  
327 ( $0.4 < ICC < 0.6$ ), good ( $0.6 < ICC < 0.75$ ) and excellent ( $0.75 < ICC < 1$ ).

328 In this study, the  $ICC$  was calculated for each interregional morphological  
329 similarity and each network measure (global and nodal) under all possible  
330 combinations of 4 morphological indices, 2 atlases and 2 similarity measures. This  
331 resulted in a total of 16  $ICC$  matrices ( $148 \times 148$  or  $68 \times 68$ ) for interregional  
332 morphological similarity, 160  $ICC$  values for global network measures and 48  $ICC$   
333 vectors (148 or 68) for nodal network measures.

334

### 335 **Statistical analysis**

#### 336 *Effects of different analytical strategies on morphological similarity networks.*

337 We explored effects of different choices of morphological index, brain parcellation  
338 atlas and similarity measure on morphological similarity networks at multiple levels.  
339 First, at the level of interregional morphological similarity, we first examined  
340 differences in the mean morphological similarity over all possible pairs of regions  
341 between the two parcellation atlases regardless of morphological indices and  
342 similarity measures (t-test). Then, for each brain parcellation atlas, we performed

343 two-way repeated ANOVA on the morphological similarity between any pair of  
344 regions (10,878 ANOVA under the a2009s parcellation atlas and 2,278 ANOVA under  
345 the a2005s parcellation atlas). Second, at the level of global network organization, we  
346 performed three-way repeated ANOVA on each global network measure (10 ANOVA).  
347 Finally, at the level of local network organization, we first compared differences in the  
348 mean nodal centrality across all regions for each nodal centrality measure between the  
349 two parcellation atlases regardless of morphological indices and similarity measures  
350 (2 t-tests; nodal degree was excluded from this analysis because the mean nodal  
351 degree was equal among all participants in terms of the sparsity-based thresholding  
352 procedure). Then, under each brain parcellation atlas, we performed two-way repeated  
353 ANOVA on each nodal measure of each region (444 ANOVA under the a2009s  
354 parcellation atlas and 204 ANOVA under the a2005s parcellation atlas). For  
355 significant effects, simple effects were further examined (paired t-test). All results  
356 were corrected for multiple comparisons using the false discovery rate (FDR)  
357 procedure at the level of  $q < 0.05$ , when applicable.

358 ***Effects of different analytical strategies on TRT reliability of morphological***  
359 ***similarity networks.*** Effects of different analytical strategies on the TRT reliability of  
360 morphological similarity networks were also examined at multiple levels. First, at the  
361 level of interregional morphological similarity, we first tested differences in the mean  
362 connectional *ICC* over all possible pairs of regions between the two parcellation  
363 atlases regardless of morphological indices and similarity measures (t-test). Then,  
364 under each brain parcellation atlas, we performed two-way repeated ANOVA on all

365 connectional *ICC* values (2 ANOVA). Second, at the level of global network  
366 organization, we performed three-way repeated ANOVA on *ICC* values for all global  
367 network measures. Finally, at the level of local network organization, we first  
368 examined differences in the mean nodal *ICC* over all regions between the two  
369 parcellation atlases regardless of morphological indices and similarity measures (3  
370 t-tests). Then, under each brain parcellation atlas, we performed two-way repeated  
371 ANOVA on all nodal *ICC* values for each nodal measure (6 ANOVA). For significant  
372 effects, simple effects were further examined (paired t-test). All results were corrected  
373 for multiple comparisons using the FDR procedure at the level of  $q < 0.05$ , when  
374 applicable.

375 In addition, we utilized Z-tests (McGraw and Wong, 1996) to locate edges,  
376 global measures and regions, whose *ICC* values were significantly affected by  
377 different analytical strategies. Specifically, for two given *ICC* values  $ICC_1$  and  $ICC_2$ ,  
378 we first transformed the difference between  $ICC_1$  and  $ICC_2$  into  $z$ :

$$z = \frac{1}{2} \ln \frac{1 + (k + 1)(ICC_1 - ICC_2)}{1 - (ICC_1 - ICC_2)},$$

379 where  $k$  is the number of repeated observations (2 in this study). The  $z$  statistic has a  
380 mean of 0 with variance (McGraw and Wong, 1996):

$$381 \quad \sigma^2 = \frac{k}{2(N-2)(k-1)},$$

382 where  $N$  is the number of participants. Then, we transformed the  $z$  into a  $Z$  score with  
383 standard normal distribution:

$$Z = \frac{z - 0}{\sqrt{\frac{k}{2(N-2)(k-1)}}} = \frac{\sqrt{N-2}}{2} \ln \frac{1 + (ICC_1 - ICC_2)}{1 - (ICC_1 - ICC_2)}$$
$$= \sqrt{N-2} \tanh^{-1}(ICC_1 - ICC_2).$$

384 The Z-test was performed for each interregional morphological similarity and each  
385 nodal centrality measure for each region (FD/GI/SD/CT: *KLDs* versus *JSDs*;  
386 *KLDs/JSDs*: FD versus GI, FD versus SD, FD versus CT, GI versus SD, GI versus CT  
387 and SD versus CT), and each global network measure (FD/GI/SD/CT - a2005s/a2009s:  
388 *KLDs* versus *JSDs*; FD/GI/SD/CT - *KLDs/JSDs*: a2005s versus a2009s;  
389 a2005s/a2009s - *KLDs/JSDs*: FD versus GI, FD versus SD, FD versus CT, GI versus  
390 SD, GI versus CT and SD versus CT). All results were corrected for multiple  
391 comparisons using the FDR procedure at the level of  $q < 0.05$ , when applicable.

392

### 393 **Effects of sample size on morphological similarity networks**

394 To test effects of different sample sizes on morphological similarity networks, we  
395 correlated the cross-subject mean nodal centrality map (concatenated across the three  
396 nodal measures) from a subgroup of participants with that from all participants. The  
397 subgroup of participants was randomly selected from all participants with sample size  
398 varying from 10 to 870 (interval = 10). This subgroup sampling procedure was  
399 repeated 1,000 times to generate 1,000 correlation coefficients at any fixed sample  
400 size, whose means and standard errors were calculated.

401

### 402 **Validation analysis**

403       ***Twin subjects.*** The HCP S900 dataset includes twin subjects, which may yield  
404 bias for our results. Thus, we re-analyzed the HCP S900 data to estimate the  
405 reproducibility of our results by excluding twin subjects (338).

406       ***High-resolution parcellation atlas.*** In this study, we utilized the a2005s atlas and  
407 a2009s atlas for network node definition because they are two of the most commonly  
408 used surface parcellation schemes in previous brain network studies (e.g., Buchanan  
409 et al., 2020; Rodríguez-Cruces et al., 2020; Seibert et al., 2011; Zhang et al., 2019).  
410 However, these two atlases are relatively coarser (68 and 148 regions, respectively),  
411 which may be insufficient to represent local characteristics of finer-level brain regions.  
412 Thus, we further re-analyzed the data by constructing individual morphological  
413 similarity networks with a high-resolution atlas, which divides the cerebral surface  
414 into 360 regions (termed MMP atlas; Glasser et al., 2016). It should be noted that we  
415 mainly focused on a more practical question in guiding studies of morphological  
416 similarity networks: whether brain parcellation atlases with higher resolutions will  
417 give rise to higher test-retest reliabilities. We did not re-analyze the HCP S900  
418 dataset because of the huge amount of computation, exponentially increased  
419 computing time with the number of network nodes and a growing body of evidence  
420 for parcellation-dependent human brain networks (Arslan et al., 2018).

421       ***Smoothing size of CT maps.*** In this study, individual CT maps were smoothed  
422 using a Gaussian kernel with 15-mm full width at half maximum, which was smaller  
423 than those for the other three morphological indices (Gaussian kernel with 25-mm full  
424 width at half maximum). To test whether the differences in smoothing size could lead

425 to relatively poor performance in TRT reliability for CT-based morphological  
426 similarity networks (see Results), we smoothed individual CT maps again (BNU TRT  
427 dataset) using a Gaussian kernel with 25-mm full width at half maximum, followed by  
428 network parameter and ICC calculation.

429 **Brain size and regional size.** Brain size is an important confounding factor for  
430 analysis of brain morphology. In addition, previous functional (Wang et al., 2009) and  
431 morphological (Seidlitz et al., 2018) brain network studies showed the existence of  
432 relationships between regional size and nodal centrality. Thus, in this study we  
433 calculated cross-subject Pearson correlation between each global network measure  
434 and global morphological values, and cross-node, person-level Pearson correlation  
435 between each nodal centrality measure and regional size (defined as the number of  
436 vertex in a region) for each type of morphological similarity networks.

437

## 438 **Results**

### 439 **Interregional similarities of morphological similarity networks**

440 *Similarity matrices.* Unless stated otherwise, all results reported are exemplified  
441 using the a2009s atlas for brain parcellation and the *JSDs* for interregional similarity  
442 estimation.

443 Figure 2 shows the mean morphological similarity matrices derived from the four  
444 morphological indices of FD, GI, SD and CT. In general, the cross-subject mean  
445 interregional similarity was large with relatively small variance for each edge of each  
446 type of morphological similarity networks (FD:  $0.725 \pm 0.074$ ; GI:  $0.724 \pm 0.069$ ; SD:

447  $0.717 \pm 0.121$ ; CT:  $0.737 \pm 0.072$ ). Nonetheless, morphological index-dependent  
448 similarity patterns were evident. For example, the SD-based morphological similarity  
449 networks were clearly different from the others by visual inspection. This was further  
450 confirmed by the relatively low Spearman's rank correlations in the mean similarity  
451 matrix between any pair of morphological similarity networks ( $r_{\text{FD-GI}} = 0.213$ ;  $r_{\text{FD-SD}} =$   
452  $0.136$ ;  $r_{\text{FD-CT}} = 0.156$ ;  $r_{\text{GI-SD}} = 0.156$ ;  $r_{\text{GI-CT}} = 0.304$ ;  $r_{\text{SD-CT}} = 0.289$ ). Interestingly, we  
453 consistently found that the mean interregional similarity for edges linking  
454 geometrically corresponding regions between two hemispheres (i.e., homotopic  
455 connections) was significantly higher than that for edges linking nonhomotopic  
456 regions (i.e., heterotopic connections) regardless of the types of morphological  
457 similarity networks (t-test; FD:  $P \approx 0$ ; GI:  $P \approx 0$ ; SD:  $P \approx 0$ ; CT:  $P \approx 0$ ).

458 Both descriptive and inferential statistical results mentioned above were  
459 consistently observed regardless choices of brain parcellation atlas and similarity  
460 measure.

461 ***Effects of morphological index, brain parcellation and similarity measure.***

462 Significant differences were observed in the mean interregional morphological  
463 similarity across all edges when using either the a2009s or the a2005s atlases for brain  
464 parcellation ( $P \approx 0$ ). Further analyses of the interregional morphological similarity of  
465 each edge under both atlases consistently revealed that all edges were significantly  
466 affected by choices of at least one factor of morphological index or similarity measure  
467 ( $P < 0.05$ , FDR corrected). These findings jointly suggest widespread influence of  
468 different analytical strategies on interregional similarity patterns of morphological

469 similarity networks. Notably, consistent with our previous study (Wang et al., 2016),  
470 no post hoc analyses were conducted since comparisons of numerical values have no  
471 utility with respect to the selection of optimal analytical strategies.

472

### 473 **Global organization of morphological similarity networks**

474 *Small-worldness, efficiency and modularity.* Each individual morphological  
475 similarity network exhibited small-world organization, high parallel efficiency and  
476 modular structure over the entire sparsity range regardless of the morphological  
477 indices. That is, compared with matched random networks, individual morphological  
478 similarity networks had higher  $C_p$  and approximately equal  $L_p$ , higher  $E_{loc}$  and  
479 approximately equal  $E_{glob}$ , and higher  $Q$  (Fig. 2). These organizational principles were  
480 consistently observed under other combinations of brain parcellation atlases and  
481 similarity measures.

### 482 *Effects of morphological index, brain parcellation and similarity measure.*

483 Despite the common organizational principles, three-way repeated ANOVA revealed  
484 that quantitative values of all global network measures were significantly affected by  
485 choices of morphological index, brain parcellation atlas and/or similarity measure ( $P$   
486  $< 0.05$ , FDR corrected). Again, no post hoc analyses were further conducted, as  
487 explained above.

488

### 489 **Local organization of morphological similarity networks**

490 *Hubs.* Visual inspection indicated that the overall patterns of nodal centrality



491 measures were spatially heterogeneous and depended on different analytical strategies.  
492 Thus, we first calculated Pearson correlation coefficients between each pair of nodal  
493 centrality maps (4 morphological indices  $\times$  2 similarity measures  $\times$  3 nodal centrality  
494 measures) averaged across all participants under each parcellation atlas. The  
495 significance level for each correlation coefficient was estimated using a recently  
496 proposed approach that corrects for spatial autocorrelation of brain maps (Burt et al.,  
497 2020). Specifically, for each pair of nodal centrality maps used in the correlation  
498 analysis, one of them was randomly selected as a target map and 10,000 surrogate  
499 maps were generated that matched with the target map with respect to spatial  
500 autocorrelation. Each of the surrogate maps was then used to re-compute the Pearson  
501 correlation coefficient with the other map, yielding a null distribution for the expected  
502 value of Pearson correlation by chance. Subsequently, a *P*-value was estimated as the  
503 fraction of surrogate maps which generated a Pearson correlation equal to or greater  
504 than the real Pearson correlation. Of note, variability into the estimate of the *P*-value  
505 introduced by finite sampling size was accounted for by using a binomial distribution  
506 to estimate the size of sampling fluctuations. As shown in Figure 3, we found that  
507 under each parcellation atlas different nodal centrality measures exhibited highly  
508 similar spatial patterns regardless of the choices of similarity measure (a2009s:  $r =$   
509  $0.891 \pm 0.087$ ; a2005s:  $r = 0.714 \pm 0.214$ ), while the spatial similarities became  
510 dramatically low when the correlations were calculated between different  
511 morphological indices (a2009s:  $r = 0.306 \pm 0.053$ ; a2005s:  $r = 0.312 \pm 0.134$ ). These  
512 findings indicate that the factor of morphological index dominates spatial distributions

513 of nodal centrality measures. Notably, the correlation pattern in regional centrality  
514 profiles was obviously different from the correlation pattern in regional mean  
515 morphological values (Table S2). For example, compared with the moderate negative  
516 correlations in regional mean values between GI and CT (a2009s:  $r = -0.476 \pm 0.083$ ;  
517 a2005s:  $r = -0.501 \pm 0.083$ ), low positive correlations were observed in regional  
518 centrality profiles between GI-based and CT-based morphological similarity networks  
519 (a2009s/*JSDs*:  $r = 0.363 \pm 0.048$ ; a2009s/*KLDs*:  $r = 0.366 \pm 0.047$ ; a2005s/*JSDs*:  $r =$   
520  $0.276 \pm 0.087$ ; a2005s/*KLDs*:  $r = 0.278 \pm 0.087$ ). The discrepancies suggest that our  
521 findings are not affected by the existence of some spatial correlations in regional  
522 mean values between different morphological indices.

523       Furthermore, given central roles of highly connected regions (i.e., hubs), we  
524 identified hubs, which were defined as regions with values in the top 10% of each  
525 nodal centrality measure. We found several common features of the identified hubs,  
526 despite differential spatial distributions across different morphological indices and  
527 nodal centrality measures (Fig.S1). First, the majority of hubs was located at  
528 bilaterally homologous regions, with the ratio of such hubs to all hubs varying  
529 between 40.0% and 80.0% (mean = 62.2%) among different morphological indices  
530 and nodal centrality measures. Second, most hubs were located at brain sulci,  
531 especially at the junction between different lobes, with the ratio of such hubs to all  
532 hubs varying between 60.0% and 86.7% (mean = 75.0%) among different  
533 morphological indices and nodal measures. Finally, several regions were consistently  
534 identified hubs that were independent of choices of morphological index and nodal

535 centrality measure. These features also existed under other combinations of brain  
536 parcellation atlases and similarity measures (except for the second feature when  
537 regional parcellation was based on the a2005s atlas, which was composed of only  
538 gyral-based regions).

539 Finally, we defined a consistent hub score (*CHs*), which was calculated as the  
540 number of times a region was identified as a hub under all combinations of  
541 morphological index, similarity measure and nodal centrality measure under each  
542 parcellation atlas. Figure 4 shows regions with the top 10% highest values of *CHs*.

543 ***Effects of morphological index, brain parcellation and similarity measure.***

544 Between-atlas comparisons of the mean centrality value across all regions revealed  
545 significant differences in nodal efficiency and betweenness ( $P \approx 0$ ). Further two-way  
546 repeated ANOVA revealed that all nodal centrality measures of all regions were  
547 significantly affected by choices of morphological index and/or similarity measure  
548 under both the a2009s and a2005s atlases ( $P < 0.05$ , FDR corrected).

549

550 **TRT reliability of interregional similarities of morphological similarity networks**

551 ***ICC of similarity matrices.*** Based on the BNU TRT dataset, extremely high  
552 correlations across edges were observed in the mean similarity matrices between the  
553 two sessions regardless of different morphological indices (all  $r > 0.966$ , Fig. S2).  
554 Further TRT reliability analysis on the interregional similarity of each edge revealed  
555 that 99.8%, 88.8%, 96.6% and 80.6% of all edges exhibited good or above TRT  
556 reliability (i.e.,  $ICC > 0.6$ ) for the FD-, GI-, SD- and CT-based morphological

557 similarity networks, respectively. The high TRT reliability was also observed under  
558 other combinations of brain parcellation atlases and similarity measures.

559 *Effects of morphological index, brain parcellation and similarity measure.*

560 First, between-atlas comparison of all connectional *ICC* values (concatenated across  
561 different morphological indices and similarity measures) revealed that the TRT  
562 reliabilities were significantly higher for the a2009s than a2005s atlas ( $ICC_{a2009s} =$   
563  $0.801 \pm 0.135$ ,  $ICC_{a2005s} = 0.782 \pm 0.149$ ;  $t_{102902} = 17.378$ ,  $P < 0.001$ ). Then, under  
564 each brain parcellation atlas, two-way repeated ANOVA consistently revealed that the  
565 mean *ICC* values across all edges were significantly modulated by choices of  
566 morphological index and similarity measure with a significant interaction (all  $P \approx 0$ ).  
567 Post hoc analyses revealed that: 1) the *ICC* differed significantly among brain  
568 networks constructed using different morphological indices no matter the choices of  
569 brain parcellation atlas and similarity measure (FD > SD > GI > CT; all  $P < 0.05$ ,  
570 FDR corrected across 24 t-tests in total); and 2) the *ICC* differed significantly among  
571 morphological similarity networks constructed using different similarity measures  
572 regardless of choices of brain parcellation atlases ( $JSDs > KLDs$  for FD-, GI- and  
573 SD-based morphological similarity networks, and  $KLDs > JSDs$  for CT-based  
574 morphological similarity networks; all  $P < 0.05$ , FDR corrected across 8 t-tests in  
575 total). Finally, we located edges whose TRT reliabilities were affected by choices of  
576 morphological index and similarity measure. The results showed that: 1) no edges  
577 exhibited significant differences in TRT reliabilities when morphological similarity  
578 networks were constructed using *JSDs* or *KLDs* for interregional similarity estimation

579 ( $P > 0.05$ , FDR corrected); and 2) the TRT reliabilities of up to 7.3% of the edges for  
580 the a2009s atlas and of up to 19.2% of the edges for the a2005s atlas were  
581 significantly different when morphological similarity networks were constructed  
582 using different morphological indices ( $P < 0.05$ , FDR corrected). Interestingly, the  
583 TRT reliabilities of the identified edges exhibited a common pattern of  $FD > SD > GI >$   
584 CT (Fig. S3).

585

#### 586 **TRT reliability of global network measures of morphological similarity networks**

587 *ICC of global network measures.* Individual morphological similarity networks  
588 exhibited small-world organization, high parallel efficiency and modular structure  
589 regardless of the data sessions (Fig. S4). The *ICC* analysis further revealed that most  
590 global network measures exhibited fair to excellent TRT reliabilities (Fig. S5).

#### 591 *Effects of morphological index, brain parcellation and similarity measure.*

592 Three-way repeated ANOVA revealed that the *ICC* of global measures were  
593 significantly modulated by the factors of morphological index ( $F_{3,159} = 105.728$ ,  $P \approx 0$ )  
594 and similarity measure ( $F_{1,159} = 5.296$ ,  $P = 0.047$ ), and the modulation depended on  
595 choices of brain parcellation atlas ( $F_{3,159} = 8.349$ ,  $P < 0.001$  for the interaction  
596 between morphological index and brain parcellation atlas, and  $F_{1,159} = 15.351$ ,  $P =$   
597 0.004 for the interaction between similarity measure and brain parcellation atlas) (Fig.  
598 5). Further post hoc analyses revealed that: 1) the TRT reliabilities of global network  
599 measures were significantly higher for *JSDs*-based than for *KLDs*-based  
600 morphological similarity networks under the a2005s ( $t_{39} = 2.834$ ,  $P = 0.007$ ) but not

601 the a2009s ( $t_{39} = 0.093$ ,  $P = 0.926$ ) atlas; and 2) the TRT reliabilities of global  
602 network measures differed significantly between any pair of morphological indices  
603 with a pattern of  $SD > FD > CT > GI$  under the a2005s atlas (all  $P < 0.05$ , FDR  
604 corrected), while they were significantly higher for the FD- and SD- than for the GI-  
605 and CT-based morphological similarity networks under the a2009s atlas ( $P < 0.05$ ,  
606 FDR corrected). Finally, we identified specific global measures whose TRT  
607 reliabilities were affected by choices of morphological index, brain parcellation atlas  
608 and similarity measure. The results showed that: 1) no global measures exhibited  
609 significant differences in TRT reliabilities when morphological similarity networks  
610 were constructed using the a2009s or a2005s atlas for brain parcellation ( $P > 0.05$ ,  
611 FDR corrected); 2) no global measures exhibited significant differences in TRT  
612 reliabilities when morphological similarity networks were constructed using *JSDs* or  
613 *KLDs* for interregional similarity estimation ( $P > 0.05$ , FDR corrected); and 3) the  
614 TRT reliabilities of many global measures were significantly affected by choices of  
615 morphological index ( $P > 0.05$ , FDR corrected) with a common pattern of FD- and  
616 SD- > GI- and CT-based morphological similarity networks (Fig. S6).

617

### 618 **TRT reliability of nodal network measures of morphological similarity networks**

619 *ICC of nodal centralities*. Similar to nodal centrality maps, the overall patterns  
620 of nodal *ICC* were spatially heterogeneous and depended on different analytical  
621 strategies. Thus, we also calculated the Pearson correlation between any pair of *ICC*  
622 maps under each atlas (4 morphological indices  $\times$  2 similarity measures  $\times$  3 nodal

623 measures). Again, the significance levels of the resultant correlation coefficients were  
624 estimated using the approach from (Burt et al., 2020) to correct for spatial  
625 autocorrelation of brain maps. The results showed high correlation coefficients  
626 between different nodal centrality measures regardless of the choice of similarity  
627 measure (a2009s:  $r = 0.869 \pm 0.139$ ; a2005s:  $r = 0.574 \pm 0.326$ ). However, the  
628 correlation coefficients between different morphological indices were dramatically  
629 low (a2009s:  $r = 0.274 \pm 0.145$ ; a2005s:  $r = 0.258 \pm 0.120$ ) (Fig. S7).

630 We further divided all brain regions into five categories in terms of their *ICC*  
631 values. As shown in Figures 6 and S8, a considerable proportion of brain regions  
632 exhibited good to excellent TRT reliabilities for most morphological indices and  
633 nodal centrality measures. Nevertheless, it was evident that the proportions were  
634 higher for the FD- and SD- than for the GI- and CT-based morphological similarity  
635 networks and were higher for nodal degree and efficiency than for nodal betweenness.

636 Finally, we identified regions under each brain parcellation atlas that consistently  
637 exhibited high TRT reliabilities regardless of different analytical strategies by  
638 defining a consistent excellent reliability score (*CERs*) as the number of times a  
639 region exhibited excellent TRT reliability ( $ICC > 0.75$ ) under all combinations of  
640 morphological indices, similarity measures and nodal metrics. Figure 7 shows the  
641 regions with the top 10% highest values of *CERs*.

#### 642 ***Effects of morphological index, brain parcellation and similarity measure.***

643 First, comparison of all nodal *ICC* values (concatenated across different  
644 morphological indices and similarity measures) between the two parcellation atlases

645 showed that the TRT reliabilities were significantly higher for the a2009s than for the  
646 a2005s atlas for each nodal measure ( $k_i$ :  $ICC_{a2009s} = 0.803 \pm 0.135$ ,  $ICC_{a2005s} = 0.778 \pm$   
647  $0.149$ ;  $t_{1710} = 3.557$ ,  $P \approx 0$ ;  $e_i$ :  $ICC_{a2009s} = 0.803 \pm 0.136$ ,  $ICC_{a2005s} = 0.773 \pm 0.154$ ;  
648  $t_{1710} = 4.081$ ,  $P \approx 0$ ;  $b_i$ :  $ICC_{a2009s} = 0.665 \pm 0.189$ ,  $ICC_{a2005s} = 0.624 \pm 0.207$ ;  $t_{1710} =$   
649  $4.023$ ,  $P \approx 0$ ).

650 Then, under each brain parcellation atlas, two-way repeated ANOVA revealed  
651 that choices of morphological index and similarity measure significantly affected the  
652 mean  $ICC$  of nodal degree (all  $P < 0.004$ ) and nodal efficiency (all  $P < 0.006$ ) with  
653 nonsignificant interaction effects (all  $P > 0.05$ ). For nodal betweenness, significant  
654 effects were only observed for the factor of morphological index under both the  
655 a2009s and a2005s atlases (both  $P \approx 0$ ). Further post hoc analyses revealed that 1) the  
656 TRT reliabilities of nodal degree and nodal efficiency were higher for  $JSDs$ -based  
657 than  $KLDs$ -based morphological similarity networks under each brain parcellation  
658 atlas (all  $P < 0.05$ , FDR corrected across 4 t-tests in total); and 2) the TRT reliabilities  
659 of nodal degree and efficiency exhibited a pattern of FD- > SD- > GI- > CT-based  
660 morphological similarity networks under the a2009s atlas and a pattern of FD- and  
661 SD- > GI- > CT-based morphological similarity networks under the a2005s atlas; and  
662 nodal betweenness exhibited a pattern of SD- > FD- > GI- > CT-based morphological  
663 similarity networks for both atlases (all  $P < 0.05$ , FDR corrected across 36 t-tests in  
664 total).

665 Finally, we identified regions whose TRT reliabilities were affected by choices of  
666 morphological index and similarity measure. We found that: 1) no regions exhibited



667 significant differences in TRT reliabilities for any nodal centrality measure when  
668 morphological similarity networks were constructed using *JSDs* or *KLDs* for  
669 interregional similarity estimation ( $P > 0.05$ , FDR corrected); and 2) the TRT  
670 reliabilities of up to 43.2% of the regions under the a2009s atlas and of up to 61.8% of  
671 the regions under the a2005s atlas were significantly different when morphological  
672 similarity networks were constructed using different morphological indices ( $P < 0.05$ ,  
673 FDR corrected). Interestingly, the TRT reliabilities of the identified regions exhibited  
674 a common pattern of FD- and SD- > GI- and CT-based morphological similarity  
675 networks (Figs. S9-S12).

676 ***Differences in TRT reliability between hub and non-hub regions.*** We compared  
677 the TRT reliability between hub and non-hub regions under each analytical  
678 combination of morphological index, brain parcellation atlas and similarity measure  
679 (permutation test, 10,000 times). No significant differences were found regardless of  
680 the analytical strategies ( $P > 0.05$ , FDR corrected).

681

### 682 **Effects of sample size on individual morphological similarity networks**

683 Highly positive correlations were observed between the nodal centrality profiles  
684 (concatenated across nodal measures) averaged over 10 randomly selected samples  
685 and the mean nodal centrality profile across all participants ( $r_{\text{FD}} = 0.944 \pm 0.007$ ;  $r_{\text{GI}} =$   
686  $0.936 \pm 0.007$ ;  $r_{\text{SD}} = 0.970 \pm 0.005$ ;  $r_{\text{CT}} = 0.936 \pm 0.008$ ). With increasing sample size,  
687 the correlations continually increased and the variability naturally decreased, with a  
688 tipping point observed when samples exceeded ~70 participants ( $r_{\text{FD}} = 0.992 \pm 0.001$ ;

689  $r_{GI} = 0.991 \pm 0.001$ ;  $r_{SD} = 0.996 \pm 0.001$ ;  $r_{CT} = 0.991 \pm 0.001$ ) (Fig. 8). More  
690 importantly, this feature was observed under other combinations of brain parcellation  
691 atlases and similarity measures.

692

### 693 **Reproducibility of our results**

694 *Effects of twin subjects.* After excluding twin subjects from the HCP S900  
695 dataset, we found that all results reported remained largely unchanged, indicating  
696 little effects of twin subjects on our results. The new results are briefly summarized  
697 below.

698 1) *Edge-level analysis.* we found: a) relatively low Spearman's rank correlations  
699 in the mean similarity matrix between any pair of morphological similarity networks  
700 ( $r_{FD-GI} = 0.240$ ;  $r_{FD-SD} = 0.154$ ;  $r_{FD-CT} = 0.170$ ;  $r_{GI-SD} = 0.167$ ;  $r_{GI-CT} = 0.304$ ;  $r_{SD-CT} =$   
701  $0.304$ ); b) higher mean interregional similarity for edges linking homotopic regions  
702 than edges linking heterotopic regions regardless of the types of morphological  
703 similarity networks (FD:  $t = 13.833$ ,  $P \approx 0$ ; GI:  $t = 12.321$ ,  $P \approx 0$ ; SD:  $t = 20.844$ ,  $P \approx$   
704  $0$ ; CT:  $t = 15.821$ ,  $P \approx 0$ ); c) significant differences in the mean interregional  
705 morphological similarity between the a2005s atlas and a2009s atlas ( $t = 91.119$ ,  $P \approx$   
706  $0$ ); and d) significant effects of morphological index and/or similarity measure on the  
707 interregional morphological similarity of each edge under the two parcellation atlases  
708 (two-way repeated ANOVA;  $P < 0.05$ , FDR corrected).

709 2) *Global-level analysis.* We found that all global network measures were  
710 significantly affected by choices of morphological index, brain parcellation atlas

711 and/or similarity measure (three-way repeated ANOVA,  $P < 0.05$ , FDR corrected).

712       3) *Nodal-level analysis*. We found: a) highly similar spatial patterns among  
713 different nodal centrality measures for the same morphological indices (a2009s:  $r =$   
714  $0.869 \pm 0.084$ ; a2005s:  $r = 0.844 \pm 0.139$ ) but dramatically low spatial similarities  
715 between different morphological indices (a2009s:  $r = 0.305 \pm 0.053$ ; a2005s:  $r =$   
716  $0.267 \pm 0.144$ ); b) significant differences in the mean centrality across all regions  
717 between the a2005s atlas and a2009s atlas (nodal efficiency:  $t = 230.836$ ,  $P \approx 0$ ; nodal  
718 betweenness:  $t = 560.849$ ,  $P \approx 0$ ); and c) significant effects of morphological index  
719 and/or similarity measure on each nodal centrality measure of each region under the  
720 two atlases (two-way repeated ANOVA;  $P < 0.05$ , FDR corrected).

721       4) *Analysis of sample size*. We found that the correlation of mean nodal centrality  
722 profiles between randomly selected samples and all participants continually increased  
723 with increasing sample size, with a tipping point observed when samples exceeded  
724  $\sim 70$  participants ( $r_{FD} = 0.992 \pm 0.001$ ;  $r_{GI} = 0.991 \pm 0.001$ ;  $r_{SD} = 0.996 \pm 0.001$ ;  $r_{CT} =$   
725  $0.991 \pm 0.001$ ).

726       ***Effects of high-resolution parcellation atlas***. Based on randomly selected 50  
727 participants from the HCP S900 dataset, we found the existence of small-worldness,  
728 high parallel efficiency, modularity and hubs for surface-based single-subject  
729 morphological similarity networks. Moreover, these network measures derived from  
730 the MMP atlas were significantly different from those derived from the a2005s atlas  
731 and a2009s atlas, and were dependent on choices of morphological index and/or  
732 similarity measure. All these findings are as expected and in line with the main

733 results.

734       Based on the BNU TRT dataset, we found that compared with the a2005s atlas  
735 and a2009s atlas, the MMP atlas was associated with significantly higher TRT  
736 reliabilities in interregional morphological similarities (a2005s:  $0.782 \pm 0.149$ ; a2009s:  
737  $0.801 \pm 0.135$ ; MMP:  $0.817 \pm 0.125$ ), global (a2005s:  $0.644 \pm 0.208$ ; a2009s:  
738  $0.644 \pm 0.140$ ; MMP:  $0.673 \pm 0.130$ ) and local (a2005s:  $0.725 \pm 0.186$ ; a2009s:  
739  $0.757 \pm 0.169$ ; MMP:  $0.773 \pm 0.152$ ) network measures. It should be noted that this  
740 general conclusion does not always hold for global network measures when  
741 considering the other two factors of morphological index and similarity measure. All  
742 TRT reliability results in this study are summarized in Table 1.

743       *Effects of smoothing size.* Based on the BNU TRT dataset, we found that the  
744 usage of a larger smoothing kernel (25-mm full width at half maximum) resulted in  
745 significantly higher TRT reliabilities for interregional morphological similarities and  
746 nodal centralities but lower TRT reliabilities for global network measures for the  
747 CT-based morphological similarity networks (paired t-test;  $P < 0.05$ , Bonferroni  
748 corrected; Table S3). Nonetheless, the differences did not affect our general findings  
749 that CT-based morphological similarity networks performed worse than the other three  
750 types of morphological similarity networks with respect to TRT reliability. That is, no  
751 matter which smoothing size (15-mm or 25-mm full width at half maximum) was  
752 used, significantly lower TRT reliabilities were found for the CT-based than FD-, GI-  
753 and SD-based morphological similarity networks for interregional morphological  
754 similarities, global network measures and nodal centralities (paired t-test;  $P < 0.05$ ,

755 Bonferroni corrected; Table S3). These findings indicate that differences in smoothing  
756 kernel among different morphological indices contribute little to the observed  
757 differences in TRT reliabilities among different types of morphological similarity  
758 networks.

### 759 **Relationships between morphological similarity networks and brain/regional**

760 **size.** Very low correlations were found between each global network measure and  
761 global morphological values regardless of the type of morphological similarity  
762 networks (Table S4). These findings suggest a lack of relationships between the  
763 morphological similarity networks and brain size. For nodal centrality measures,  
764 weak-moderate correlations were observed with regional size that were dependent on  
765 morphological index, brain parcellation atlas, similarity measure and nodal centrality  
766 type (Table S5). These findings indicate obvious effects of regional size on nodal  
767 centrality for the surface-based single-subject morphological similarity networks, an  
768 issue that should be taken into account in future studies. The findings of brain  
769 size-independent but regional size-dependent morphological similarity networks are  
770 in accordance to a previous study that constructed single-subject morphological  
771 similarity networks with different methods (Seidlitz et al., 2018).

772

### 773 **Discussion**

774 In this study, we constructed and topologically characterized surface-based  
775 single-subject morphological similarity networks, and systematically evaluated their  
776 reproducibility with respect to effects of different analytical strategies, sample

777 size-varying stability and test-retest reliability. We found that the morphological  
778 similarity networks exhibited nontrivial organizational principles, including  
779 small-worldness, high parallel efficiency, modularity and hubs, regardless of the  
780 analytical strategies used. Nevertheless, quantitative values of these organizational  
781 principles largely depended on the choices of morphological index, brain parcellation  
782 atlas and similarity measure. Moreover, the morphological similarity networks varied  
783 with the number of participants and approached stability until the sample size  
784 exceeded  $\sim 70$ . Finally, both interregional similarities and topological properties of the  
785 morphological similarity networks presented fair to good, even excellent, TRT  
786 reliabilities. Interestingly, significantly higher reliabilities were observed when  
787 interregional morphological similarity was estimated with the *JSDs* than with the  
788 *KLDs* and when the morphological similarity networks were based on the FD and SD  
789 rather than the GI and CT. Altogether, these findings suggest that surface-based  
790 single-subject morphological similarity networks provide a reliable approach for  
791 large-scale brain network studies.

792

### 793 **Specifically organized and reliable morphological similarity networks**

794 The human brain is powerful in both modular information processing across local  
795 regions and distributed information processing over the entire brain, allowing  
796 complicated cognition and behavior. A large number of studies have indicated that  
797 such powerful features of the human brain benefit from nontrivial wiring layouts of  
798 both functional and structural brain networks as revealed by graph-based network

799 approaches, such as small-worldness, high parallel efficiency, modularity and hubs  
800 (Bullmore and Sporns, 2012; Liao et al., 2017; Sporns and Betzel, 2016; van den  
801 Heuvel and Sporns, 2013). Therefore, in this study we also utilized graph-based  
802 metrics to examine whether the surface-based single-subject morphological similarity  
803 networks constructed with our method are governed by nontrivial organizational  
804 principles rather than are wired in a random manner. We found that the surface-based  
805 single-subject morphological similarity networks also exhibited the optimized  
806 organization. That is, compared with matched random networks, the surface-based  
807 single-subject morphological similarity networks showed higher clustering coefficient,  
808 local efficiency and modularity, approximately equal characteristic path length and  
809 global efficiency and the existence of hubs. Moreover, the optimized organization was  
810 consistently observed regardless of different choices of morphological index, brain  
811 parcellation atlas and similarity measure. The robust and inherent characteristic  
812 indicates that the surface-based single-subject morphological similarity networks are  
813 specifically organized rather than are wired in a random manner. It should be noted  
814 that the interpretation of graph-based network findings largely depends on how  
815 network nodes and edges are defined. In this study, network edges were defined as  
816 divergence-based similarity in the distribution of intraregional morphological values.  
817 This type of similarity is very different from routinely used functional connectivity  
818 (i.e., statistical interdependence in functional signal fluctuations between regions) and  
819 structural connectivity (i.e., fiber pathways between regions). Thus, our findings are  
820 not directly comparable with previous functional and structural brain networks. It is

821 interesting to investigate the relationships between the divergence-based  
822 morphological similarity and functional/structural connectivity in the future, which  
823 can aid in understanding the extent to which different modalities of brain networks are  
824 driven by similar organizational principles.

825 An interesting finding in this study was that consistent hub regions were mainly  
826 in cortical sulci under the a2009s atlas. Compared with cortical gyri, cortical sulci  
827 have been found to show greater physical strain in various kinds of injuries in studies  
828 from animals, computational models and human postmortem data (Cloots et al., 2008;  
829 Ghajari et al., 2017; Goldstein et al., 2012). Accordingly, cortical sulci are frequently  
830 reported to be more vulnerable to pathological tau protein deposition and associated  
831 brain atrophy in patients with traumatic brain injury and chronic traumatic  
832 encephalopathy (Cole et al., 2018; Johnson et al., 2012; McKee et al., 2013). On the  
833 other hand, brain network hubs are also found to be susceptible to various brain  
834 disorders (Crossley et al., 2014). Thus, our results provide a possible bridge to link the  
835 two sets of previous findings, although a direct examination is needed on the  
836 relationships among brain sulci and gyri, hubs and diseases. Finally, the surface-based  
837 single-subject morphological similarity networks presented fair to good, even  
838 excellent, reliability in both interregional similarities and network measures under all  
839 analytical combinations. This is consistent with previous studies that constructed  
840 individual-level morphological similarity networks with similar methods in brain  
841 volume space (Kong et al., 2015; Wang et al., 2016) and via different methods (Jiang  
842 et al., 2017; Li et al., 2017; Yu et al., 2018).



843           Taken together, our findings suggest that surface-based single-subject  
844 morphological similarity networks can provide an important alternative to reliably  
845 uncover organizational principles of large-scale brain networks. Nevertheless, it  
846 should be pointed out that although optimized topological organizations and high  
847 TRT reliabilities were consistently observed for the surface-based single-subject  
848 morphological similarity networks regardless of different analytical strategies,  
849 quantitative values depended largely on how the morphological similarity networks  
850 were constructed, which is discussed below.

851

#### 852 **Effects of different morphological indices on morphological similarity networks**

853 We found that different morphological indices resulted in significantly different  
854 values for interregional morphological similarities and network measures. This is  
855 consistent with previous studies of population-based morphological similarity  
856 networks showing morphological index specific topological organization in health  
857 and disease (Collantoni et al., 2017; Sanabria-Diaz et al., 2010). Given the highly  
858 complex, folded nature of the human cerebral cortex, these findings are not surprising  
859 because different indices characterize morphological architecture from different  
860 aspects. For example, CT reflects the size, density and arrangement of cells (neurons,  
861 neuroglia and nerve fibers), whereas GI measures the ratio between the total area of  
862 the cortex and the area that is visible in a circular region of interest. Thus, the  
863 observed differences may indicate that different morphological indices capture  
864 distinct processes of interregional interactions or different aspects of the same

865 interactive process (e.g., mechanical, neurochemical, and/or axonal connections).  
866 Currently, understanding mechanisms behind different morphological indices and  
867 their interrelationships is an ongoing research field. Evidence from genetic and  
868 developmental studies has shown that different morphological indices are associated  
869 with distinct genetic influences (Panizzon et al., 2009; Strike et al., 2019; Winkler et  
870 al., 2010) and exhibit differential developmental/aging trajectories (Hogstrom et al.,  
871 2013; Raznahan et al., 2011; Wierenga et al., 2014). Accordingly, it is plausible to  
872 speculate that genetic, developmental/aging, and environmental factors may partly  
873 contribute to the distinct network topology among different morphological indices. It  
874 should be noted that the explanations above are speculative and more studies are  
875 needed to provide direct empirical evidence for mechanistic understanding of network  
876 differences among different morphological indices.

877       Furthermore, different morphological indices were associated with significantly  
878 different values of TRT reliability of the morphological similarity networks.  
879 Specifically, TRT reliability was significantly higher for FD- and SD- than for GI-  
880 and CT-based morphological similarity networks. The discrepancy may be due to  
881 differences in computational complexity, sensitivity to noise, and/or developmental  
882 rates among the morphological indices. For example, in contrast with the intuitional  
883 CT, FD is an extremely obscure and compact measure of shape complexity, which  
884 condenses all details into a single numeric value. Such summary measures may be  
885 more resistant to noise than those that are dominated by a single aspect of brain  
886 morphology. In addition, given distinct age-related trajectories among different

887 morphological indices (Raznahan et al., 2011; Wierenga et al., 2014), those indices  
888 showing faster age-related changes are typically related to lower values of TRT  
889 reliability due to greater within-subject variance. Overall, our findings suggest that  
890 future studies should consider utilizing different morphological indices, in particular  
891 SD and FD from the perspective of TRT reliability, to provide a finer-grained  
892 characterization of surface-based single-subject morphological similarity networks in  
893 typical and atypical populations.

894

895 **Effects of different brain parcellation atlases on morphological similarity**  
896 **networks**

897 We found that different choices of the a2009s and a2005s atlases resulted in  
898 significantly different surface-based single-subject morphological similarity networks  
899 in terms of the values of interregional morphological similarities and network  
900 measures. This is consistent with numerous previous studies showing brain  
901 parcellation-dependent functional (Ren et al., 2019; Wang et al., 2009), structural  
902 (Wei et al., 2017; Zalesky et al., 2010) and morphological (Sanabria-Diaz et al., 2010;  
903 Wang et al., 2016) brain networks (for recent reviews, see (Arslan et al., 2018; Qi et  
904 al., 2015; Yao et al., 2015)). Accordingly, our findings together with previous studies  
905 collectively suggest that the dependence on regional brain parcellation atlases is a  
906 universal characteristic of large-scale brain networks, and future studies must consider  
907 the influence of this factor regardless of the data modalities from which the brain  
908 networks are obtained. Several potential sources may account for the observed

909 differences. First, the composition is different between the two atlases: the a2009s  
910 atlas is composed of sulco-gyral structures, while the a2005s atlas is made up of  
911 gyral-based neuroanatomical regions (Desikan et al., 2006; Destrieux et al., 2010).  
912 Given substantial differences between cerebral sulci and gyri in genetics, morphology,  
913 axonal pathways and function (Ge et al., 2018; Hilgetag and Barbas, 2005; Li et al.,  
914 2015; Liu et al., 2017; Zeng et al., 2015; Zhang et al., 2018), it is not surprising to  
915 observe differential network organization between the two atlases. Second, the  
916 number of regions is different between the two atlases: 148 in the a2009s atlas versus  
917 68 in the a2005s atlas. Previous studies have shown that differences in network size  
918 (i.e., the number of nodes) significantly affect the topological organization of  
919 functional and structural brain networks (Wang et al., 2009; Zalesky et al., 2010).  
920 Finally, the two atlases differ in regional size, which is thought to be associated with  
921 nodal centralities of functional and structural brain networks (Hagmann et al., 2008;  
922 Wang et al., 2009). Together, all these factors may at least partially account for the  
923 observed brain parcellation-related differences in surface-based single-subject  
924 morphological similarity networks.

925 Further TRT reliability analyses revealed that the a2009s atlas was associated  
926 with higher reliability than the a2005s atlas for the surface-based single-subject  
927 morphological similarity networks. When using the high-resolution MMP atlas, even  
928 higher TRT reliability was observed. These findings indicate that brain parcellation  
929 atlases with higher resolutions may give rise to more reliable morphological similarity  
930 networks. The discrepancy may be attributable to the more sophisticated methods

931 used to generate higher-resolution atlases: most structures in the a2005s atlas were  
932 defined using a relatively coarse ‘sulcal’ approach (manual tracing from the depth of  
933 one sulcus to another, thus incorporating the gyrus within) (Desikan et al., 2006); the  
934 entire cortical surface of the a2009s atlas was classified as gyral or sulcal at a vertex  
935 level during the generation (Destrieux et al., 2010); and the MMP atlas is based on a  
936 multi-modal method that integrates multidimensional information from different  
937 imaging modalities (e.g., architectural measures derived from T1-weighted and  
938 T2-weighted structural images, cortical function measured using task functional MRI,  
939 and functional connectivity estimated from resting-state functional MRI). Currently,  
940 obtaining accurate and reliable parcellation atlases of the human brain is an important  
941 goal for brain science. In this regard, individualized, multidimensional information  
942 guided and phylogeny and ontogeny inspired parcellation methods may be promising  
943 directions in the future (Eickhoff et al., 2018). Overall, our findings suggest that  
944 relative to the a2005s atlas and a2009s atlas, the MMP atlas may be a better choice for  
945 surface-based single-subject morphological similarity network studies from the  
946 perspective of TRT reliability.

947

#### 948 **Effects of different similarity measures on morphological similarity networks**

949 Although the morphological similarity networks constructed via *KLDs* and *JSDs*  
950 exhibited largely similar patterns, quantitative values differed significantly between  
951 the two sets of networks. This is consistent with numerous previous studies showing  
952 that functional and structural brain networks depend on the means to estimate

953 interregional connectivity (Liang et al., 2012; Sarwar et al., 2019; Zalesky et al.,  
954 2012). Accordingly, it seems that the dependence on interregional connectivity  
955 estimation methods in addition to regional brain parcellation atlases is another  
956 universal characteristic of large-scale brain networks, and thus future studies should  
957 carefully choose suitable measures and methods for estimating interregional  
958 connectivity in terms of their research themes, purposes and contents. The observed  
959 differences may be attributable to different mathematical properties between the *KLD*  
960 and *JSD*, although the latter is based on the former. First, the *KLD* and *JSD* have  
961 different value ranges: the *KLD* is nonnegative without an upper limit, while the *JSD*  
962 is bounded by 0 and 1. Second, the *KLD* is not symmetric, while the *JSD* is symmetric.  
963 Thus, compared with the *JSD*, the *KLD* undergoes additional processing steps (e.g.,  
964 exponential transform) to generate symmetric and bounded surface-based  
965 single-subject morphological similarity networks. This may introduce extra noise or  
966 unknown disturbance in estimating interregional morphological similarities. This  
967 might also be the reason why the *JSDs*-based morphological similarity networks  
968 showed higher reliability for interregional morphological similarities and network  
969 measures. Overall, given the mathematical advantages of the *JSD* relative to the *KLD*  
970 and higher TRT reliability of the *JSDs*-based than *KLDs*-based morphological  
971 similarity networks, we recommend using the *JSDs* as a measure for estimating  
972 interregional morphological similarity in future studies. In the future, it will be  
973 necessary to systematically compare the *JSDs* with other similarity measures and  
974 methods for a possible better choice, such as multivariate Euclidean distance (Yu et

975 al., 2018) and Fréchet distance.

976

977 **Effects of different sample sizes on morphological similarity networks**

978 We found that surface-based single-subject morphological similarity networks varied

979 along with the number of participants and approached stability until the sample size

980 exceeded ~70. Moreover, the critical value was largely independent of different

981 analytical strategies. Thus, we recommend at least 70 participants for future studies of

982 surface-based single-subject morphological similarity networks. However, such a

983 sample size may be challenging to attain for innovative clinical and translational

984 research due to cost and feasibility concerns. Although small sample size undermines

985 the reliability (Button et al., 2013), it can produce more projected scientific value per

986 dollar spent than larger sample size for studies of new ideas (Bacchetti et al., 2011).

987 Interestingly, we found that even when the sample size was only 10, the mean nodal

988 centrality profile of the surface-based single-subject morphological similarity

989 networks was largely similar to that from all 876 participants. This suggests limited

990 effects of sample size on surface-based single-subject morphological similarity

991 networks. This feature makes the approach proposed here a potential tradeoff between

992 sample size and research cost and feasibility for future brain network studies.

993 Presumably, the weak influence of sample size may reflect small interindividual

994 differences in surface-based single-subject morphological similarity networks. An

995 interesting topic for future exploration is the association of interindividual differences

996 in surface-based single-subject morphological similarity networks with interindividual

997 differences in cognition and behavior.

998

### 999 **Limitations and Future Directions**

1000 First, consistent with numerous functional and structural brain network studies, the  
1001 surface-based single-subject morphological similarity networks were largely  
1002 dependent on choices of regional brain parcellation atlases and similarity estimation  
1003 methods. Thus, systematic research on different processing pipelines is warranted in  
1004 the future for establishing a “better” methodological framework in the construction of  
1005 surface-based single-subject morphological similarity networks. Second, although the  
1006 surface-based single-subject morphological similarity networks exhibited high TRT  
1007 reliability under different analytical strategies, their repeatability across multiple sites,  
1008 scanners, scanning parameters and magnetic fields should be further examined. Third,  
1009 similar to functional and structural brain networks, surface-based single-subject  
1010 morphological similarity networks constructed here also exhibited optimized  
1011 topological organizations (e.g., small-worldness and hubs). It will be interesting in the  
1012 future to quantify the similarities and differences in organizational principles between  
1013 morphological and functional/structural brain networks. Fourth, this study extended  
1014 our previous work of single-subject morphological similarity networks from volume  
1015 space to cerebral cortical surface. A previous functional MRI study showed that  
1016 surface-based computation can increase TRT reliability of local short-range functional  
1017 connectivity (Zuo et al., 2013). Whether surface-based morphological similarity  
1018 networks outperform volume-based morphological similarity networks in TRT



1019 reliability is thus an interesting topic in the future. Fifth, only four surface-based  
1020 morphological indices that were computationally available for the CAT12 toolbox  
1021 were used to construct morphological similarity networks in this study. Future studies  
1022 can examine the feasibility of our method on the basis of other morphological indices,  
1023 such as surface area and surface normal. Sixth, in this study, we found that different  
1024 morphological indices were associated with distinct interregional similarity patterns  
1025 and topological organization of surface-based single-subject morphological similarity  
1026 networks. It is important to develop network models to integrate the complementary  
1027 information for a holistic view of morphological similarity networks. At the current  
1028 stage, multilayer network methods may be a good solution for such a requirement (De  
1029 Domenico, 2017; Vaiana and Muldoon, 2018). Seventh, we utilized binary rather than  
1030 weighted network model to characterize morphological similarity networks in this  
1031 study because weighted networks are computationally expensive. This is particularly  
1032 important for this study because of the huge amount of computation. It's essential for  
1033 future studies to employ weighted network model, which can provide more  
1034 information on the topological organization of morphological similarity networks, and  
1035 may be more sensitive to capture morphological network alterations under conditions  
1036 where interregional morphological similarities alter profoundly, such as diseases,  
1037 development and aging. Finally, after demonstrating the reliable, nonrandom  
1038 organization of the divergence-based single-subject morphological similarity  
1039 networks, the next important thing is to uncover biological meaning of the networks.  
1040 For example, to what extent are the morphological similarity networks under genetic

1041 control and to what extent do the morphological similarity networks determine  
1042 individual behavioral and cognitive performance? Such studies are crucial to speed up  
1043 future application of the divergence-based single-subject morphological similarity  
1044 networks in health and disease.

1045

#### 1046 **Conclusion**

1047 In conclusion, this study constructed and evaluated surface-based single-subject  
1048 morphological similarity networks and demonstrated that the morphological similarity  
1049 networks possessed nontrivial topological organization, were affected by different  
1050 analytical strategies but largely independent of sample size, and exhibited high TRT  
1051 reliability. Based on these findings, we conclude that the surface-based single-subject  
1052 morphological similarity networks can serve as a reliable way to characterize  
1053 large-scale brain networks in future studies.

1054

#### 1055 **Conflict of Interests**

1056 The authors declare no competing interests.

1057

#### 1058 **Data Availability Statement**

1059 All data that support the findings of this study are from publicly available datasets.

1060

#### 1061 **Acknowledgements**

1062 This work was supported by the National Natural Science Foundation of China (Nos.

1063 81922036 and 81671764), Key Realm R&D Program of Guangdong Province (No.  
1064 2019B030335001) and Key Realm R&D Program of Guangzhou (No.  
1065 202007030005). Data were provided [in part] by the Human Connectome Project,  
1066 WU-Minn Consortium (Principal Investigators: David Van Essen and Kamil Ugurbil;  
1067 1U54MH091657) funded by the 16 NIH Institutes and Centers that support the NIH  
1068 Blueprint for Neuroscience Research; and by the McDonnell Center for Systems  
1069 Neuroscience at Washington University.

1070 **References**

- 1071 Alexander-Bloch, A., Giedd, J.N., Bullmore, E., 2013a. Imaging structural  
1072 co-variance between human brain regions. *Nature Reviews Neuroscience* 14, 322.
- 1073 Alexander-Bloch, A., Raznahan, A., Bullmore, E., Giedd, J., 2013b. The convergence  
1074 of maturational change and structural covariance in human cortical networks. *Journal*  
1075 *of Neuroscience* 33, 2889-2899.
- 1076 Arslan, S., Ktena, S., Makropoulos, A., Robinson, E., Rueckert, D., Parisot, S., 2018.  
1077 Human brain mapping: A systematic comparison of parcellation methods for the  
1078 human cerebral cortex. *Neuroimage* 170, 5-30.
- 1079 Ashburner, J., 2007. A fast diffeomorphic image registration algorithm. *Neuroimage*  
1080 38, 95-113.
- 1081 Bacchetti, P., Deeks, S.G., McCune, J.M., 2011. Breaking free of sample size dogma  
1082 to perform innovative translational research. *Science translational medicine* 3,  
1083 87ps24-87ps24.
- 1084 Bassett, D.S., Bullmore, E., Verchinski, B.A., Mattay, V.S., Weinberger, D.R.,  
1085 Meyer-Lindenberg, A., 2008. Hierarchical organization of human cortical networks in  
1086 health and schizophrenia. *Journal of Neuroscience* 28, 9239-9248.
- 1087 Buchanan, C.R., Bastin, M.E., Ritchie, S.J., Liewald, D.C., Madole, J.W.,  
1088 Tucker-Drob, E.M., Deary, I.J. and Cox, S.R., 2020. The effect of network  
1089 thresholding and weighting on structural brain networks in the UK Biobank.  
1090 *Neuroimage* 211, 116443.
- 1091 Bullmore, E., Sporns, O., 2012. The economy of brain network organization. *Nature*  
1092 *Reviews Neuroscience* 13, 336-349.
- 1093 Burt, J.B., Helmer, M., Shinn, M., Anticevic, A. and Murray, J.D., 2020. Generative  
1094 modeling of brain maps with spatial autocorrelation. *NeuroImage* 220, 117038.
- 1095 Button, K.S., Ioannidis, J.P., Mokrysz, C., Nosek, B.A., Flint, J., Robinson, E.S.,  
1096 Munafò, M.R., 2013. Power failure: why small sample size undermines the reliability  
1097 of neuroscience. *Nature Reviews Neuroscience* 14, 365-376.
- 1098 Cloots, R., Gervaise, H., Van Dommelen, J., Geers, M., 2008. Biomechanics of  
1099 traumatic brain injury: influences of the morphologic heterogeneities of the cerebral  
1100 cortex. *Annals of biomedical engineering* 36, 1203.
- 1101 Cole, J.H., Jolly, A., de Simoni, S., Bourke, N., Patel, M.C., Scott, G., Sharp, D.J.,  
1102 2018. Spatial patterns of progressive brain volume loss after moderate-severe

- 1103 traumatic brain injury. *Brain* 141, 822-836.
- 1104 Collantoni, E., Meneguzzo, P., Tenconi, E., Manara, R., Santonastaso, P., Favaro, A.,  
1105 2017. Structural Covariance Networks in Anorexia Nervosa (AN): A Multimodal  
1106 Graph Theoretical Analysis. *European Psychiatry* 41, S282-S282.
- 1107 Crossley, N.A., Mechelli, A., Scott, J., Carletti, F., Fox, P.T., McGuire, P., Bullmore,  
1108 E.T., 2014. The hubs of the human connectome are generally implicated in the  
1109 anatomy of brain disorders. *Brain* 137, 2382-2395.
- 1110 Dahnke, R., Yotter, R.A., Gaser, C., 2013. Cortical thickness and central surface  
1111 estimation. *Neuroimage* 65, 336-348.
- 1112 De Domenico, M., 2017. Multilayer modeling and analysis of human brain networks.  
1113 *Giga Science* 6, gix004.
- 1114 Desai, R., Liebenthal, E., Possing, E.T., Waldron, E., Binder, J.R., 2005. Volumetric  
1115 vs. surface-based alignment for localization of auditory cortex activation. *Neuroimage*  
1116 26, 1019-1029.
- 1117 Desikan, R.S., Ségonne, F., Fischl, B., Quinn, B.T., Dickerson, B.C., Blacker, D.,  
1118 Buckner, R.L., Dale, A.M., Maguire, R.P., Hyman, B.T., 2006. An automated labeling  
1119 system for subdividing the human cerebral cortex on MRI scans into gyral based  
1120 regions of interest. *Neuroimage* 31, 968-980.
- 1121 Destrieux, C., Fischl, B., Dale, A., Halgren, E., 2010. Automatic parcellation of  
1122 human cortical gyri and sulci using standard anatomical nomenclature. *Neuroimage*  
1123 53, 1-15.
- 1124 Eickhoff, S.B., Yeo, B.T. and Genon, S., 2018. Imaging-based parcellations of the  
1125 human brain. *Nature Reviews Neuroscience* 19, 672-686.
- 1126 Evans, A.C., 2013. Networks of anatomical covariance. *Neuroimage* 80, 489-504.
- 1127 Ge, F., Li, X., Razavi, M.J., Chen, H., Zhang, T., Zhang, S., Guo, L., Hu, X., Wang,  
1128 X., Liu, T., 2018. Denser growing fiber connections induce 3-hinge gyral folding.  
1129 *Cerebral cortex* 28, 1064-1075.
- 1130 Ghajari, M., Hellyer, P.J., Sharp, D.J., 2017. Computational modelling of traumatic  
1131 brain injury predicts the location of chronic traumatic encephalopathy pathology.  
1132 *Brain* 140, 333-343.
- 1133 Glasser, M.F., Coalson, T.S., Robinson, E.C., Hacker, C.D., Harwell, J., Yacoub, E.,  
1134 Ugurbil, K., Andersson, J., Beckmann, C.F., Jenkinson, M. and Smith, S.M., 2016. A  
1135 multi-modal parcellation of human cerebral cortex. *Nature* 536, 171-178.

- 1136 Goldstein, L.E., Fisher, A.M., Tagge, C.A., Zhang, X.-L., Velisek, L., Sullivan, J.A.,  
1137 Upreti, C., Kracht, J.M., Ericsson, M., Wojnarowicz, M.W., 2012. Chronic traumatic  
1138 encephalopathy in blast-exposed military veterans and a blast neurotrauma mouse  
1139 model. *Science translational medicine* 4, 134ra160-134ra160.
- 1140 Hagemann, P., Cammoun, L., Gigandet, X., Meuli, R., Honey, C.J., Wedeen, V.J.,  
1141 Sporns, O., 2008. Mapping the structural core of human cerebral cortex. *PLoS*  
1142 *biology* 6.
- 1143 He, Y., Chen, Z.J., Evans, A.C., 2007. Small-world anatomical networks in the human  
1144 brain revealed by cortical thickness from MRI. *Cerebral cortex* 17, 2407-2419.
- 1145 Hilgetag, C.C., Barbas, H., 2005. Developmental mechanics of the primate cerebral  
1146 cortex. *Anatomy and embryology* 210, 411.
- 1147 Hogstrom, L.J., Westlye, L.T., Walhovd, K.B., Fjell, A.M., 2013. The structure of the  
1148 cerebral cortex across adult life: age-related patterns of surface area, thickness, and  
1149 gyrification. *Cerebral cortex* 23, 2521-2530.
- 1150 Jiang, J., Zhou, H., Duan, H., Liu, X., Zuo, C., Huang, Z., Yu, Z., Yan, Z., Initiative,  
1151 A.s.D.N., 2017. A novel individual-level morphological brain networks constructing  
1152 method and its evaluation in PET and MR images. *Heliyon* 3, e00475.
- 1153 Johnson, V.E., Stewart, W., Smith, D.H., 2012. Widespread tau and amyloid  $\beta$  pathology  
1154 many years after a single traumatic brain injury in humans. *Brain pathology*  
1155 22, 142-149.
- 1156 Kong, X., Liu, Z., Huang, L., Wang, X., Yang, Z., Zhou, G., Zhen, Z., Liu, J., 2015.  
1157 Mapping individual brain networks using statistical similarity in regional morphology  
1158 from MRI. *PloS one* 10, e0141840.
- 1159 Kullback, S., Leibler, R.A., 1951. On information and sufficiency. *The annals of*  
1160 *mathematical statistics* 22(1), 79-86.
- 1161 Li, G., Liu, T., Ni, D., Lin, W., Gilmore, J.H., Shen, D., 2015. Spatiotemporal patterns  
1162 of cortical fiber density in developing infants, and their relationship with cortical  
1163 thickness. *Human brain mapping* 36, 5183-5195.
- 1164 Li, W., Yang, C., Shi, F., Wu, S., Wang, Q., Nie, Y., Zhang, X., 2017. Construction of  
1165 individual morphological brain networks with multiple morphometric features.  
1166 *Frontiers in Neuroanatomy* 11, 34.
- 1167 Liang, X., Wang, J., Yan, C., Shu, N., Xu, K., Gong, G., He, Y., 2012. Effects of  
1168 different correlation metrics and preprocessing factors on small-world brain  
1169 functional networks: a resting-state functional MRI study. *PloS one* 7.

- 1170 Liao, X., Vasilakos, A.V., He, Y., 2017. Small-world human brain networks:  
1171 perspectives and challenges. *Neuroscience & Biobehavioral Reviews* 77, 286-300.
- 1172 Lin, Q., Dai, Z., Xia, M., Han, Z., Huang, R., Gong, G., Liu, C., Bi, Y., He, Y., 2015.  
1173 A connectivity-based test-retest dataset of multi-modal magnetic resonance imaging  
1174 in young healthy adults. *Scientific data* 2, 1-10.
- 1175 Liu, H., Jiang, X., Zhang, T., Ren, Y., Hu, X., Guo, L., Han, J., Liu, T., 2017.  
1176 Elucidating functional differences between cortical gyri and sulci via sparse  
1177 representation HCP grayordinate fMRI data. *Brain research* 1672, 81-90.
- 1178 Luders, E., Thompson, P.M., Narr, K., Toga, A.W., Jancke, L., Gaser, C., 2006. A  
1179 curvature-based approach to estimate local gyrification on the cortical surface.  
1180 *Neuroimage* 29, 1224-1230.
- 1181 Marcus, D.S., Harms, M.P., Snyder, A.Z., Jenkinson, M., Wilson, J.A., Glasser, M.F.,  
1182 Barch, D.M., Archie, K.A., Burgess, G.C., Ramaratnam, M., Hodge, M., Horton,  
1183 W., Herrick, R., Olsen, T., McKay, M., House, M., Hileman, M., Reid, E., Harwell,  
1184 J., Coalson, T., Schindler, J., Elam, J.S., Curtiss, S.W., Van Essen, D.C., WU-Minn  
1185 HCP Consortium, 2013. Human Connectome Project informatics: quality control,  
1186 database services, and data visualization. *Neuroimage* 80, 202-219.
- 1187 Maslov, S., Sneppen, K., 2002. Specificity and stability in topology of protein  
1188 networks. *Science* 296, 910-913.
- 1189 McGraw, K.O., Wong, S.P., 1996. Forming inferences about some intraclass  
1190 correlation coefficients. *Psychological methods* 1, 30.
- 1191 McKee, A.C., Stein, T.D., Nowinski, C.J., Stern, R.A., Daneshvar, D.H., Alvarez, V.E.,  
1192 Lee, H.-S., Hall, G., Wojtowicz, S.M., Baugh, C.M., 2013. The spectrum of disease in  
1193 chronic traumatic encephalopathy. *Brain* 136, 43-64.
- 1194 Panizzon, M.S., Fennema-Notestine, C., Eyler, L.T., Jernigan, T.L., Prom-Wormley,  
1195 E., Neale, M., Jacobson, K., Lyons, M.J., Grant, M.D., Franz, C.E., 2009. Distinct  
1196 genetic influences on cortical surface area and cortical thickness. *Cerebral cortex* 19,  
1197 2728-2735.
- 1198 Qi, S., Meesters, S., Nicolay, K., ter Haar Romeny, B.M., Ossenblok, P., 2015. The  
1199 influence of construction methodology on structural brain network measures: A  
1200 review. *Journal of neuroscience methods* 253, 170-182.
- 1201 Raznahan, A., Lerch, J.P., Lee, N., Greenstein, D., Wallace, G.L., Stockman, M.,  
1202 Clasen, L., Shaw, P.W., Giedd, J.N., 2011. Patterns of coordinated anatomical change  
1203 in human cortical development: a longitudinal neuroimaging study of maturational  
1204 coupling. *Neuron* 72, 873-884.

- 1205 Ren, Y., Guo, L., Guo, C.C., 2019. A connectivity-based parcellation improved  
1206 functional representation of the human cerebellum. *Scientific reports* 9, 1-12.
- 1207 Rodríguez-Cruces, R., Bernhardt, B.C., Concha, L., 2020. Multidimensional  
1208 associations between cognition and connectome organization in temporal lobe  
1209 epilepsy. *Neuroimage* 213, 116706.
- 1210 Rubinov, M., Sporns, O., 2010. Complex network measures of brain connectivity:  
1211 uses and interpretations. *Neuroimage* 52, 1059-1069.
- 1212 Sanabria-Diaz, G., Melie-García, L., Iturria-Medina, Y., Alemán-Gómez, Y.,  
1213 Hernández-González, G., Valdés-Urrutia, L., Galán, L., Valdés-Sosa, P., 2010. Surface  
1214 area and cortical thickness descriptors reveal different attributes of the structural  
1215 human brain networks. *Neuroimage* 50, 1497-1510.
- 1216 Sarwar, T., Ramamohanarao, K., Zalesky, A., 2019. Mapping connectomes with  
1217 diffusion MRI: deterministic or probabilistic tractography? *Magnetic resonance in*  
1218 *medicine* 81, 1368-1384.
- 1219 Seibert, T.M., Brewer, J.B., 2011. Default network correlations analyzed on native  
1220 surfaces. *Journal of neuroscience methods* 198, 301-311.
- 1221 Seidlitz, J., Váša, F., Shinn, M., Romero-Garcia, R., Whitaker, K.J., Vértes, P.E.,  
1222 Wagstyl, K., Reardon, P.K., Clasen, L., Liu, S., 2018. Morphometric similarity  
1223 networks detect microscale cortical organization and predict inter-individual cognitive  
1224 variation. *Neuron* 97, 231-247.
- 1225 Shrout, P.E., Fleiss, J.L., 1979. Intraclass correlations: uses in assessing rater  
1226 reliability. *Psychological bulletin* 86, 420.
- 1227 Sporns, O., Betzel, R.F., 2016. Modular brain networks. *Annual review of psychology*  
1228 67, 613-640.
- 1229 Strike, L.T., Hansell, N.K., Couvy-Duchesne, B., Thompson, P.M., de Zubicaray, G.I.,  
1230 McMahon, K.L., Wright, M.J., 2019. Genetic complexity of cortical structure:  
1231 differences in genetic and environmental factors influencing cortical surface area and  
1232 thickness. *Cerebral cortex* 29, 952-962.
- 1233 Tijms, B.M., Seriès, P., Willshaw, D.J., Lawrie, S.M., 2012. Similarity-based  
1234 extraction of individual networks from gray matter MRI scans. *Cerebral cortex* 22,  
1235 1530-1541.
- 1236 Tijms, B.M., ten Kate, M., Gouw, A.A., Borta, A., Verfaillie, S., Teunissen, C.E.,  
1237 Scheltens, P., Barkhof, F. and van der Flier, W.M., 2018. Gray matter networks and  
1238 clinical progression in subjects with predementia Alzheimer's disease. *Neurobiology*



- 1239 of Aging 61, 75-81
- 1240 Tijms, B.M., Yeung, H.M., Sikkes, S.A., Möller, C., Smits, L.L., Stam, C.J., Scheltens,  
1241 P., van der Flier, W.M. and Barkhof, F., 2014. Single-Subject Gray Matter Graph  
1242 Properties and Their Relationship with Cognitive Impairment in Early- and  
1243 Late-Onset Alzheimer's Disease. *Brain Connectivity* 4, 337-346.
- 1244 Vaiana, M., Muldoon, S.F., 2018. Multilayer brain networks. *Journal of Nonlinear*  
1245 *Science*, 1-23.
- 1246 van den Heuvel, M.P., Sporns, O., 2013. Network hubs in the human brain. *Trends in*  
1247 *cognitive sciences* 17, 683-696.
- 1248 Van Essen, D.C., Smith, S.M., Barch, D.M., Behrens, T.E., Yacoub, E., Ugurbil, K.,  
1249 Consortium, W.-M.H., 2013. The WU-Minn human connectome project: an overview.  
1250 *Neuroimage* 80, 62-79.
- 1251 Wang, H., Jin, X., Zhang, Y., Wang, J., 2016. Single-subject morphological brain  
1252 networks: connectivity mapping, topological characterization and test-retest reliability.  
1253 *Brain and behavior* 6, e00448.
- 1254 Wang, J., Wang, L., Zang, Y., Yang, H., Tang, H., Gong, Q., Chen, Z., Zhu, C., He, Y.,  
1255 2009. Parcellation-dependent small-world brain functional networks: A  
1256 resting-state fMRI study. *Human brain mapping* 30, 1511-1523.
- 1257 Wang, J., Wang, X., Xia, M., Liao, X., Evans, A., He, Y., 2015. GRETNA: a graph  
1258 theoretical network analysis toolbox for imaging connectomics. *Frontiers in human*  
1259 *neuroscience* 9, 386.
- 1260 Wang, J., Zuo, X., Gohel, S., Milham, M.P., Biswal, B.B., He, Y., 2011. Graph  
1261 theoretical analysis of functional brain networks: test-retest evaluation on short-and  
1262 long-term resting-state functional MRI data. *PloS one* 6.
- 1263 Watts, D.J., Strogatz, S.H., 1998. Collective dynamics of 'small-world' networks.  
1264 *nature* 393, 440.
- 1265 Wei, K., Cieslak, M., Greene, C., Grafton, S.T., Carlson, J.M., 2017. Sensitivity  
1266 analysis of human brain structural network construction. *Network Neuroscience* 1,  
1267 446-467.
- 1268 Wierenga, L.M., Langen, M., Oranje, B., Durston, S., 2014. Unique developmental  
1269 trajectories of cortical thickness and surface area. *Neuroimage* 87, 120-126.
- 1270 Winkler, A.M., Kochunov, P., Blangero, J., Almasy, L., Zilles, K., Fox, P.T., Duggirala,  
1271 R., Glahn, D.C., 2010. Cortical thickness or grey matter volume? The importance of  
1272 selecting the phenotype for imaging genetics studies. *Neuroimage* 53, 1135-1146.

- 1273 Yao, Z., Hu, B., Xie, Y., Moore, P., Zheng, J., 2015. A review of structural and  
1274 functional brain networks: small world and atlas. *Brain informatics* 2, 45-52.
- 1275 Yotter, R.A., Dahnke, R., Thompson, P.M., Gaser, C., 2011a. Topological correction  
1276 of brain surface meshes using spherical harmonics. *Human brain mapping* 32,  
1277 1109-1124.
- 1278 Yotter, R.A., Nenadic, I., Ziegler, G., Thompson, P.M., Gaser, C., 2011b. Local  
1279 cortical surface complexity maps from spherical harmonic reconstructions.  
1280 *Neuroimage* 56, 961-973.
- 1281 Yotter, R.A., Thompson, P.M., Gaser, C., 2011c. Algorithms to improve the  
1282 reparameterization of spherical mappings of brain surface meshes. *Journal of*  
1283 *Neuroimaging* 21, e134-e147.
- 1284 Yu, K., Wang, X., Li, Q., Zhang, X., Li, X., Li, S., 2018. Individual morphological  
1285 brain network construction based on multivariate euclidean distances between brain  
1286 regions. *Frontiers in human neuroscience* 12.
- 1287 Zalesky, A., Cocchi, L., Fornito, A., Murray, M.M., Bullmore, E., 2012. Connectivity  
1288 differences in brain networks. *Neuroimage* 60, 1055-1062.
- 1289 Zalesky, A., Fornito, A., Harding, I.H., Cocchi, L., Yücel, M., Pantelis, C., Bullmore,  
1290 E.T., 2010. Whole-brain anatomical networks: does the choice of nodes matter?  
1291 *Neuroimage* 50, 970-983.
- 1292 Zeng, T., Chen, H., Fakhry, A., Hu, X., Liu, T., Ji, S., 2015. Allen mouse brain atlases  
1293 reveal different neural connection and gene expression patterns in cerebellum gyri and  
1294 sulci. *Brain Structure and Function* 220, 2691-2703.
- 1295 Zhao, W., Guo, S., Linli, Z., Yang, A., Lin, C., Tsai, S., 2020. Functional, Anatomical,  
1296 and Morphological Networks Highlight the Role of Basal Ganglia-Thalamus-Cortex  
1297 Circuits in Schizophrenia. *Schizophrenia Bulletin* 46, 422-443.
- 1298 Zhang, J., Wang, J., Wu, Q., Kuang, W., Huang, X., He, Y., Gong, Q., 2011. Disrupted  
1299 brain connectivity networks in drug-naive, first-episode major depressive disorder.  
1300 *Biological psychiatry* 70, 334-342.
- 1301 Zhang, T., Chen, H., Razavi, M.J., Li, Y., Ge, F., Guo, L., Wang, X., Liu, T., 2018.  
1302 Exploring 3-hinge gyral folding patterns among HCP Q3 868 human subjects.  
1303 *Human brain mapping* 39, 4134-4149.
- 1304 Zhang, Z., Allen, G.I., Zhu, H., Dunson, D., 2019. Tensor network factorizations:  
1305 Relationships between brain structural connectomes and traits. *Neuroimage* 197,  
1306 330-343.

1307 Zuo, X., Xu, T., Jiang, L., Yang, Z., Cao, X., He, Y., Zang, Y., Castellanos, F.X.,  
1308 Milham M.P., 2013. Toward reliable characterization of functional homogeneity in the  
1309 human brain: preprocessing, scan duration, imaging resolution and computational  
1310 space. *Neuroimage* 65, 374-386.

1311 **Figure Legends**

1312 **Figure 1.** Flow chart of imaging processing, network construction, topological  
1313 characterization and statistical analysis in this study. ① For each structural image  
1314 from the HCP and BNU datasets, four vertexwise morphological maps (FD, GI, SD  
1315 and CT) were first extracted. ② Each morphological map was then divided into  
1316 different numbers of regions according to two brain atlases (a2009s and a2005s). ③  
1317 Subsequently, the probability distribution function was estimated for each region in  
1318 terms of signal distribution of each morphological index and was used to estimate  
1319 interregional similarity with *JSDs* and *KLDs*, respectively. ④ This formed a total of  
1320 16 similarity matrices for each image (4 morphological indices  $\times$  2 brain parcellation  
1321 atlases  $\times$  2 similarity measures). ⑤ Before topological characterization of the  
1322 resultant similarity matrices, a sparsity-based procedure was further used to threshold  
1323 each of them into a series of binary networks. ⑥ Finally, 10 global and 3 nodal  
1324 graph theory-based network metrics were calculated to characterize topological  
1325 organization of each binary network. FD, fractal dimension; GI, gyrification index;  
1326 SD, sulcal depth; CT, cortical thickness; *JSDs*, Jensen-Shannon divergence-based  
1327 similarity; *KLDs*, Kullback-Leibler divergence-based similarity; TRT, test-retest.

1328

1329 **Figure 2.** Mean similarity matrices and global network measures of morphological  
1330 similarity networks. Upper panel: mean similarity matrices of morphological  
1331 similarity networks (brain parcellation: a2009s; similarity estimation: *JSDs*).  
1332 Although the similarity strength was large for each connection regardless of the

1333 choice of morphological index, differential similarity patterns were evident. Lower  
1334 panel: global organization of morphological similarity networks (brain parcellation:  
1335 a2009s; similarity estimation: *JSDs*). Compared with matched random networks,  
1336 individual morphological similarity networks exhibited higher clustering coefficient  
1337 (i.e., normalized  $C_p > 1$ ) and approximately equal characteristic path length (i.e.,  
1338 normalized  $L_p \sim 1$ ), higher local efficiency (i.e., normalized  $E_{loc} > 1$ ) and  
1339 approximately equal global efficiency (i.e., normalized  $E_{glob} \sim 1$ ), and higher  
1340 modularity (i.e., normalized  $Q > 1$ ), indicating small-world, highly efficient and  
1341 modular organization. FD, fractal dimension; GI, gyrification index; SD, sulcal depth;  
1342 CT, cortical thickness.

1343

1344 **Figure 3.** Spatial correlations of mean nodal centrality maps under different analytical  
1345 strategies. Under each parcellation atlas, high correlations were observed between  
1346 different nodal metrics and between different similarity measures; however,  
1347 dramatically low correlations were observed between different morphological indices.  
1348 *JSDs*, Jensen-Shannon divergence-based similarity; *KLDs*, Kullback-Leibler  
1349 divergence-based similarity; FD, fractal dimension; GI, gyrification index; SD, sulcal  
1350 depth; CT, cortical thickness;  $k_i$ , nodal degree;  $e_i$ , nodal efficiency;  $b_i$ , nodal  
1351 betweenness; \*,  $P < 0.05$ , Bonferroni corrected.

1352

1353 **Figure 4.** Consistent hubs under different analytical strategies. A specific set of  
1354 regions were consistently identified as hubs, among which regions with the top 10%

1355 of *CHs* were listed under each parcellation atlas. *CHs*, consistent hub scores.

1356

1357 **Figure 5.** TRT reliability values for global metrics under different analytical strategies.

1358 TRT reliability of global network metrics was significantly affected by choices of

1359 morphological index, brain parcellation atlas and similarity measure, with a general

1360 pattern of  $FD$  and  $SD > GI$  and  $CT$  and  $JSDs > KLDs$ . *ICC*, intraclass correlation;

1361 *JSDs*, Jensen-Shannon divergence-based similarity; *KLDs*, Kullback-Leibler

1362 divergence-based similarity; *FD*, fractal dimension; *GI*, gyrification index; *SD*, sulcal

1363 depth; *CT*, cortical thickness.

1364

1365 **Figure 6.** Proportions of regions at different levels of nodal TRT reliability (brain

1366 parcellation: a2009s; similarity estimation: *JSDs*). The proportions of regions showing

1367 excellent TRT reliability were significantly higher for nodal degree and efficiency

1368 than for nodal betweenness, and for *FD*- and *SD*-based than for *GI*- and *CT*-based

1369 morphological similarity networks. *FD*, fractal dimension; *GI*, gyrification index; *SD*,

1370 sulcal depth; *CT*, cortical thickness;  $k_i$ , nodal degree;  $e_i$ , nodal efficiency;  $b_i$ , nodal

1371 betweenness.

1372

1373 **Figure 7.** Regions consistently showing excellent TRT reliability under different

1374 analytical strategies. A specific set of regions were consistently identified to show

1375 excellent TRT reliability, among which regions with the top 10% of *CERs* are listed

1376 under each parcellation atlas. *CERs*, consistent excellent reliability scores.

1377

1378 **Figure 8.** Effect of different sample sizes on morphological similarity networks (brain  
1379 parcellation: a2009s; similarity estimation: *JSDs*). With increasing sample size, a  
1380 continuous increase was observed in the Pearson correlation coefficients between  
1381 nodal centrality profiles that were separately averaged for 1000 subgroups of  
1382 participants and nodal centrality profiles that were averaged over all participants,  
1383 while the variability naturally decreased, with a tipping point observed when samples  
1384 exceeded ~70 participants. FD, fractal dimension; GI, gyrification index; SD, sulcal  
1385 depth; CT, cortical thickness.

1386

1387 **Figure S1.** Hubs with the top 10% of nodal centrality of morphological similarity  
1388 networks (brain parcellation: a2009s; similarity estimation: *JSDs*). FD, fractal  
1389 dimension; GI, gyrification index; SD, sulcal depth; CT, cortical thickness;  $k_i$ , nodal  
1390 degree;  $e_i$ , nodal efficiency;  $b_i$ , nodal betweenness.

1391

1392 **Figure S2.** Mean similarity matrices and their intersession correlations and TRT  
1393 reliability values for morphological similarity networks (brain parcellation: a2009s;  
1394 similarity estimation: *JSDs*). No matter the choices of morphological index, the mean  
1395 similarity matrices derived from session 1 (first row) and session 2 (second row) were  
1396 highly correlated with each other (third row), with most connections showing good to  
1397 excellent TRT reliability (i.e.,  $ICC > 0.6$ , last row). *JSDs*, Jensen-Shannon  
1398 divergence-based similarity; S1, session 1; S2, session 2; *ICC*, intraclass correlation;

1399 FD, fractal dimension; GI, gyrification index; SD, sulcal depth; CT, cortical thickness.

1400

1401 **Figure S3.** Connections showing significantly different values of TRT reliability  
1402 between different morphological indices. Varied proportions of edges (numbers in  
1403 white) showed morphological index-dependent TRT reliability, with a general pattern  
1404 of  $FD > SD > GI > CT$ . *JSDs*, Jensen-Shannon divergence-based similarity; *KLDs*,  
1405 Kullback-Leibler divergence-based similarity; FD, fractal dimension; GI, gyrification  
1406 index; SD, sulcal depth; CT, cortical thickness.

1407

1408 **Figure S4.** Global organization of morphological similarity networks derived from  
1409 the BNU TRT dataset (brain parcellation: a2009s; similarity estimation: *JSDs*). For  
1410 both sessions, individual morphological similarity networks exhibited small-world,  
1411 highly efficient and modular organization. FD, fractal dimension; GI, gyrification  
1412 index; SD, sulcal depth; CT, cortical thickness.

1413

1414 **Figure S5.** TRT reliability values for global network metrics of morphological  
1415 similarity networks (brain parcellation: a2009s; similarity estimation: *JSDs*). Most  
1416 global metrics exhibited fair to excellent TRT reliability (i.e.,  $ICC > 0.6$ ) regardless of  
1417 choices of morphological index. FD, fractal dimension; GI, gyrification index; SD,  
1418 sulcal depth; CT, cortical thickness.

1419

1420 **Figure S6.** Global network measures showing significantly different TRT reliability



1421 values between different morphological indices. The TRT reliability of many global  
1422 network measures depended on the choices of morphological index, with a general  
1423 pattern of FD and SD > GI and CT. Squares/circles indicate  
1424 significant/non-significant differences, and color bars indicate t-statistics. *JSDs*,  
1425 Jensen-Shannon divergence-based similarity; *KLDs*, Kullback-Leibler  
1426 divergence-based similarity; FD, fractal dimension; GI, gyrification index; SD, sulcal  
1427 depth; CT, cortical thickness.

1428

1429 **Figure S7.** Spatial correlations of nodal TRT reliability maps under different  
1430 analytical strategies. Under each parcellation atlas, high correlations were observed  
1431 between nodal degree and efficiency and between different similarity measures;  
1432 however, dramatically low correlations were observed between nodal betweenness  
1433 and the other two nodal metrics and between different morphological indices. *ICC*,  
1434 intraclass correlation; *JSDs*, Jensen-Shannon divergence-based similarity; *KLDs*,  
1435 Kullback-Leibler divergence-based similarity; FD, fractal dimension; GI, gyrification  
1436 index; SD, sulcal depth; CT, cortical thickness;  $k_i$ , nodal degree;  $e_i$ , nodal efficiency;  
1437  $b_i$ , nodal betweenness; \*,  $P < 0.05$ , Bonferroni corrected.

1438

1439 **Figure S8.** Regional maps at different levels of nodal TRT reliability (brain  
1440 parcellation: a2009s; similarity estimation: *JSDs*). Most regions exhibited excellent  
1441 TRT reliability for FD- and SD-based morphological similarity networks regardless of  
1442 nodal measures. FD, fractal dimension; GI, gyrification index; SD, sulcal depth; CT,

1443 cortical thickness;  $k_i$ , nodal degree;  $e_i$ , nodal efficiency;  $b_i$ , nodal betweenness.

1444

1445 **Figure S9.** Regions showing significantly different TRT reliability values between  
1446 different morphological indices (brain parcellation: a2009s; similarity estimation:  
1447 *JSDs*). Varied proportions of regions (numbers in white) were identified to show  
1448 morphological index-dependent TRT reliability, with a general pattern of  $FD > SD >$   
1449  $GI > CT$ . Similar patterns were also found under other combinations of brain  
1450 parcellation atlas and similarity measure (Figure 18, 19 and 20). *JSDs*,  
1451 Jensen-Shannon divergence-based similarity;  $FD$ , fractal dimension;  $GI$ , gyrification  
1452 index;  $SD$ , sulcal depth;  $CT$ , cortical thickness;  $k_i$ , nodal degree;  $e_i$ , nodal efficiency;  
1453  $b_i$ , nodal betweenness.

1454

1455 **Figure S10.** Regions showing significantly different TRT reliability values between  
1456 different morphological indices (brain parcellation: a2009s; similarity estimation:  
1457 *KLDs*). *KLDs*, Kullback-Leibler divergence-based similarity;  $FD$ , fractal dimension;  
1458  $GI$ , gyrification index;  $SD$ , sulcal depth;  $CT$ , cortical thickness;  $k_i$ , nodal degree;  $e_i$ ,  
1459 nodal efficiency;  $b_i$ , nodal betweenness.

1460

1461 **Figure S11.** Regions showing significantly different TRT reliability values between  
1462 different morphological indices (brain parcellation: a2005s; similarity estimation:  
1463 *JSDs*). *JSDs*, Jensen-Shannon divergence-based similarity;  $FD$ , fractal dimension;  $GI$ ,

1464 gyrification index; SD, sulcal depth; CT, cortical thickness;  $k_i$ , nodal degree;  $e_i$ , nodal

1465 efficiency;  $b_i$ , nodal betweenness.

1466

1467 **Figure S12.** Regions showing significantly different TRT reliability values between

1468 different morphological indices (brain parcellation: a2005s; similarity estimation:

1469 *KLDs*). *KLDs*, Kullback-Leibler divergence-based similarity; FD, fractal dimension;

1470 GI, gyrification index; SD, sulcal depth; CT, cortical thickness;  $k_i$ , nodal degree;  $e_i$ ,

1471 nodal efficiency;  $b_i$ , nodal betweenness.

**Table 1.** Summary of TRT reliability of morphological brain networks under different analytical strategies

| Parcellation atlas | Similarity measure | Morphological index | Interregional similarity | Global organization | Local organization |
|--------------------|--------------------|---------------------|--------------------------|---------------------|--------------------|
| a2005s             | <i>KLDs</i>        | FD                  | 0.876±0.128              | 0.768±0.064         | 0.830±0.111        |
|                    |                    | GI                  | 0.734±0.141              | 0.413±0.093         | 0.663±0.166        |
|                    |                    | SD                  | 0.830±0.167              | 0.873±0.050         | 0.834±0.135        |
|                    |                    | CT                  | 0.636±0.161              | 0.514±0.152         | 0.572±0.174        |
|                    | <i>JSDs</i>        | FD                  | <b>0.877±0.127</b>       | 0.772±0.060         | 0.829±0.112        |
|                    |                    | GI                  | 0.735±0.141              | 0.418±0.087         | 0.664±0.166        |
|                    |                    | SD                  | 0.842±0.153              | <b>0.877±0.045</b>  | <b>0.835±0.135</b> |
|                    |                    | CT                  | 0.634±0.161              | 0.519±0.146         | 0.572±0.174        |
| a2009s             | <i>KLDs</i>        | FD                  | 0.883±0.098              | 0.766±0.086         | 0.842±0.115        |
|                    |                    | GI                  | 0.749±0.132              | 0.520±0.087         | 0.704±0.159        |
|                    |                    | SD                  | 0.853±0.150              | 0.766±0.037         | 0.840±0.145        |
|                    |                    | CT                  | 0.695±0.134              | 0.525±0.064         | 0.641±0.154        |
|                    | <i>JSDs</i>        | FD                  | <b>0.883±0.098</b>       | <b>0.770±0.084</b>  | <b>0.842±0.114</b> |
|                    |                    | GI                  | 0.749±0.133              | 0.516±0.087         | 0.705±0.158        |
|                    |                    | SD                  | 0.863±0.132              | 0.761±0.037         | 0.841±0.144        |
|                    |                    | CT                  | 0.693±0.136              | 0.531±0.067         | 0.641±0.155        |
| MMP                | <i>KLDs</i>        | FD                  | 0.892±0.077              | 0.743±0.073         | 0.852±0.101        |
|                    |                    | GI                  | 0.767±0.111              | 0.606±0.073         | 0.728±0.140        |
|                    |                    | SD                  | 0.886±0.121              | 0.807±0.074         | 0.844±0.130        |
|                    |                    | CT                  | 0.711±0.121              | 0.536±0.079         | 0.668±0.148        |
|                    | <i>JSDs</i>        | FD                  | 0.891±0.076              | 0.740±0.076         | <b>0.852±0.101</b> |
|                    |                    | GI                  | 0.766±0.109              | 0.605±0.075         | 0.728±0.140        |
|                    |                    | SD                  | <b>0.892±0.106</b>       | <b>0.813±0.070</b>  | 0.844±0.130        |
|                    |                    | CT                  | 0.709±0.121              | 0.537±0.078         | 0.668±0.148        |

The highest TRT reliability is highlighted in bold under each brain parcellation atlas and each analytical level. *KLDs*, Kullback-Leibler divergence-based similarity; *JSDs*, Jensen-Shannon divergence-based similarity; FD, fractal dimension; GI, gyrification index; SD, sulcal depth; CT, cortical thickness.

**HCP**  
n = 876

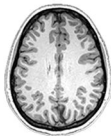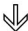

**BNU**  
n = 57

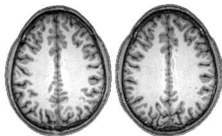

Session 1

Session 2

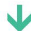

①

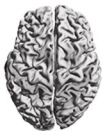

**Morphological index**  
(FD/GI/SD/CT)

②

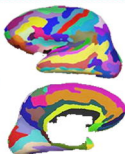

**Brain parcellation**  
(a2009s/a2005s)

③

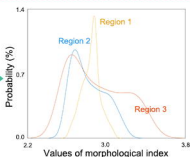

**Similarity estimation**  
(JSDs/KLDs)

④

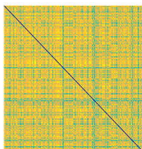

**Similarity matrix**  
(16 matrices per image)

⑤

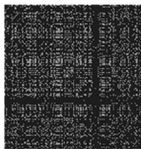

**Binary network**

⑥

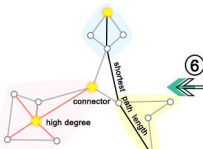

**Graph theoretical analysis**  
(10 global and 3 nodal metrics)

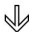

### Effects of analytical strategies

- Interregional similarities
- Global measures
- Nodal measures

### Effects of sample size

- Nodal measures

### TRT reliability

- Interregional similarities
- Global measures
- Nodal measures

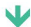

### Effects of analytical strategies

- Interregional similarities
- Global measures
- Nodal measures

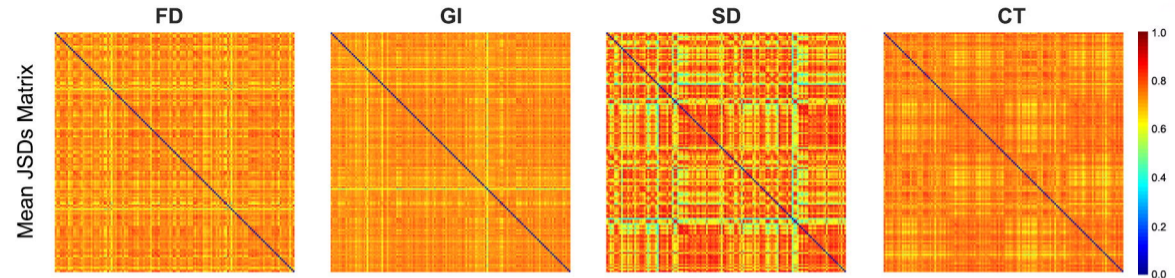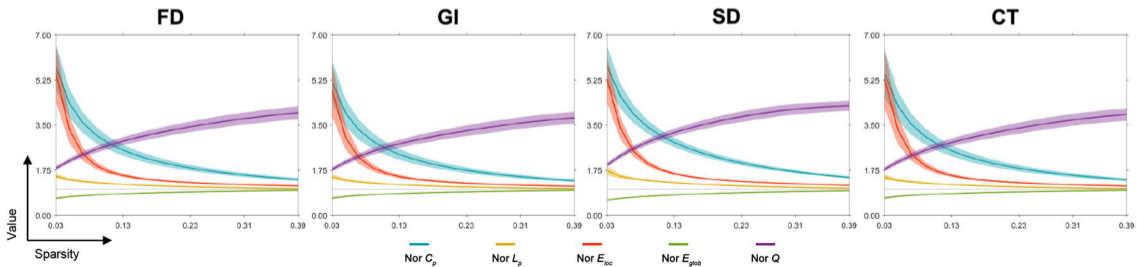

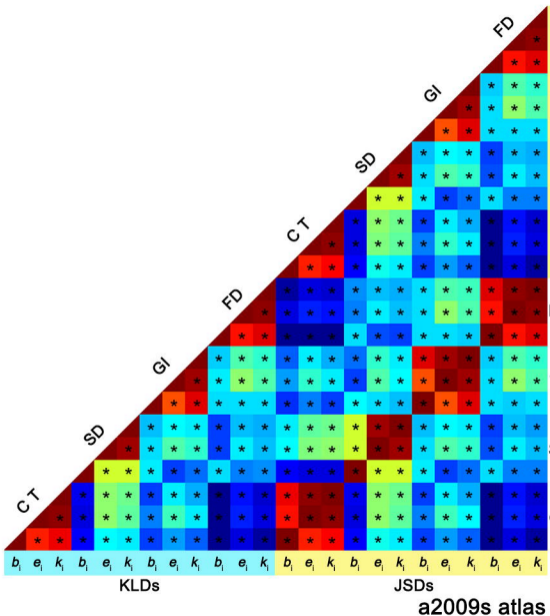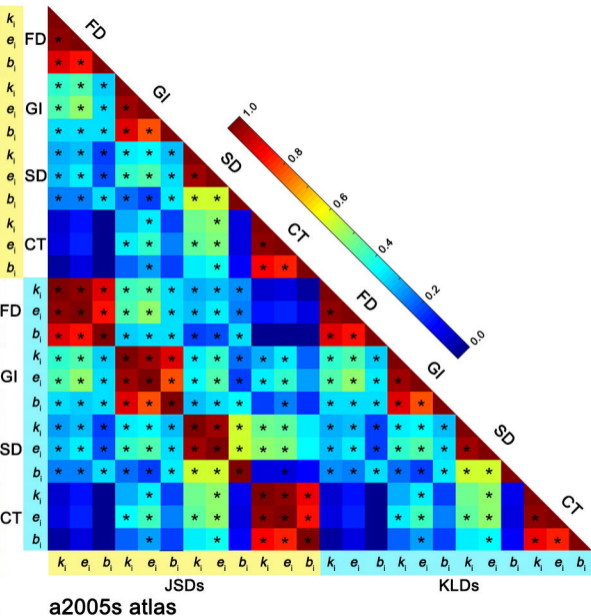

A

a2009s atlas

a2005s atlas

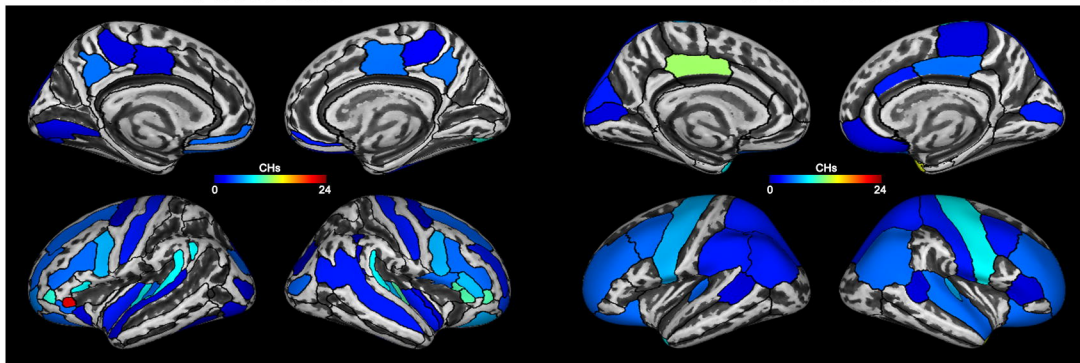

B

## Left hemisphere

CHs Name

a2005s  
atlas

- 14 *Middle temporal gyrus*
- 10 *Lateral occipital cortex*
- 8 *Inferior temporal gyrus*

a2009s  
atlas

- 24 *Horizontal ramus of the anterior segment of the lateral sulcus (or fissure)*
- 11 *Lateral orbital sulcus*
- 10 *Anterior transverse temporal gyrus (of Heschl)*
- 10 *Planum temporale or temporal plane of the superior temporal gyrus*
- 10 *Vertical ramus of the anterior segment of the lateral sulcus (or fissure)*
- 10 *Sulcus intermedius primus (of Jensen)*
- 8 *Inferior part of the precentral sulcus*

## Right hemisphere

CHs Name

- 16 *Paracentral lobule*
- 10 *Lateral occipital cortex*
- 8 *Inferior temporal gyrus*

- 12 *Horizontal ramus of the anterior segment of the lateral sulcus (or fissure)*
- 12 *Anterior transverse temporal gyrus (of Heschl)*
- 12 *Vertical ramus of the anterior segment of the lateral sulcus (or fissure)*
- 12 *Lateral orbital sulcus*
- 11 *Posterior transverse collateral sulcus*
- 10 *Planum temporale or temporal plane of the superior temporal gyrus*
- 8 *Triangular part of the inferior frontal gyrus*
- 8 *Orbital sulci (H-shaped sulci)*
- 8 *Inferior part of the precentral sulcus*
- 8 *Transverse temporal sulcus*



ICC values

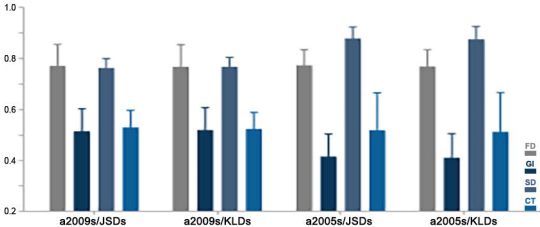

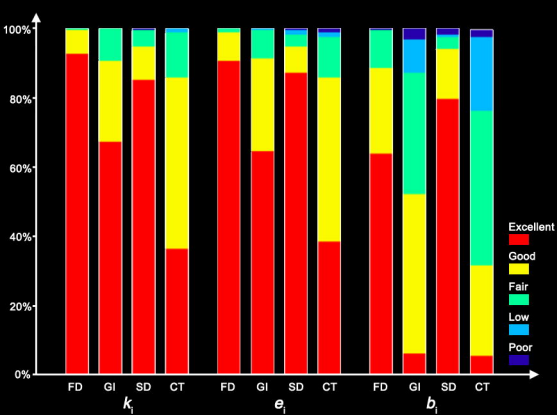

A

a2009s atlas

a2005s atlas

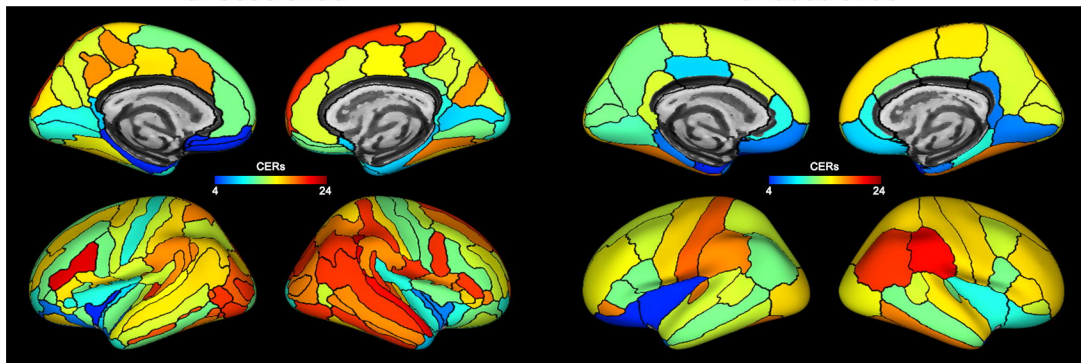

B

## Left hemisphere

CERs Name

## Right hemisphere

CERs Name

a2005s  
atlas

- 19 *Postcentral gyrus*
- 18 *Fusiform gyrus*
- 18 *Pars orbitalis*
- 18 *Supramarginal gyrus*
- 18 *Transverse temporal cortex*

- 21 *Supramarginal gyrus*
- 20 *Inferior parietal cortex*
- 18 *Fusiform gyrus*
- 18 *Inferior temporal gyrus*

a2009s  
atlas

- 22 *Inferior frontal sulcus*
- 20 *Inferior occipital gyrus (O3) and sulcus*
- 20 *Superior occipital gyrus (O1)*
- 20 *Middle occipital sulcus and lunatus sulcus*
- 20 *Anterior occipital sulcus and preoccipital notch (temporo-occipital incisure)*
- 20 *Transverse temporal sulcus*

- 22 *Sulcus intermedius primus (of Jensen)*
- 21 *Lateral aspect of the superior temporal gyrus*
- 20 *Inferior occipital gyrus (O3) and sulcus*
- 20 *Subcentral gyrus (central operculum) and sulci*
- 20 *Triangular part of the inferior frontal gyrus*
- 20 *Superior frontal gyrus (F1)*
- 20 *Superior occipital gyrus (O1)*
- 20 *Angular gyrus*
- 20 *Planum temporale or temporal plane of the superior temporal gyrus*
- 20 *Inferior temporal gyrus (T3)*
- 20 *Marginal branch (or part) of the cingulate sulcus*
- 20 *Superior occipital sulcus and transverse occipital sulcus*
- 20 *Postcentral sulcus*
- 20 *Inferior part of the precentral sulcus*
- 20 *Superior temporal sulcus (parallel sulcus)*

**FD**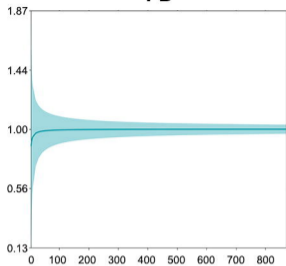**GI**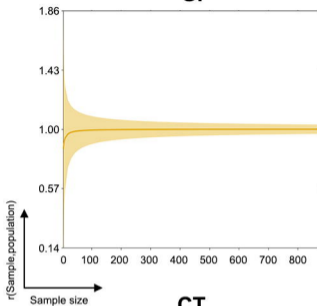**SD**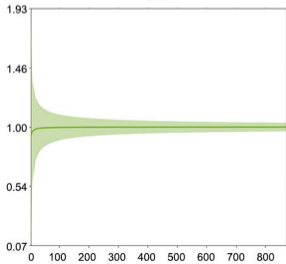**CT**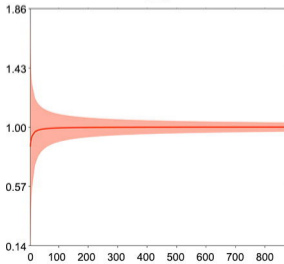

Source: https://biorxiv.org/content/10.1101/2021.01.25.428021v1.full.pdf
